1 **Full title: A single dose of antibody-drug conjugate cures a stage 1 model of**  
2 **African trypanosomiasis.**

3

4 **Short title: ADC cures stage 1 animal trypanosomiasis.**

5

6 Paula MacGregor<sup>a,#</sup>, Andrea L. Gonzalez-Munoz<sup>b,#</sup>, Fatoumatta Jobe<sup>b</sup>, Martin C.  
7 Taylor<sup>c</sup>, Steven Rust<sup>b</sup>, Alan M. Sandercock<sup>b</sup>, Olivia J.S. Macleod<sup>a</sup>, Katrien Van  
8 Bocxlaer<sup>c</sup>, Amanda F. Francisco<sup>c</sup>, Francois D'Hooge<sup>d</sup>, Arnaud Tiberghien<sup>d</sup>, Conor S.  
9 Barry<sup>d</sup>, Philip Howard<sup>d</sup>, Matthew K. Higgins<sup>e</sup>, Tristan J. Vaughan<sup>b</sup>, Ralph Minter<sup>b</sup> and  
10 Mark Carrington<sup>a,\*</sup>

11

12 <sup>a</sup> Department of Biochemistry, University of Cambridge, Tennis Court Road,  
13 Cambridge, CB2 1QW

14 <sup>b</sup> Department of Antibody Discovery and Protein Engineering, Medimmune, Granta  
15 Park, Cambridge, CB21 6GH

16 <sup>c</sup> London School of Hygiene and Tropical Medicine, London, WC1E 7HT

17 <sup>d</sup> Spirogen Ltd, The QMB Innovation Centre, New Road, London, E1 2AX

18 <sup>e</sup> Department of Biochemistry, South Parks Road, University of Oxford, OX1 3QU

19

20 <sup>#</sup> These authors contributed equally

21 <sup>\*</sup> Corresponding author: mc115@cam.ac.uk

## 22 **Abstract**

23 Infections of humans and livestock with African trypanosomes are treated with drugs  
24 introduced decades ago that are not always fully effective and often have severe  
25 side effects. Here, the trypanosome haptoglobin-haemoglobin receptor (HpHbR) has  
26 been exploited as a route of uptake for an antibody-drug conjugate (ADC) that is  
27 completely effective against *Trypanosoma brucei* in the standard mouse model of  
28 infection. Recombinant human anti-HpHbR monoclonal antibodies were isolated and  
29 shown to be internalised in a receptor-dependent manner. Antibodies were  
30 conjugated to a pyrrolobenzodiazepine (PBD) toxin and killed *T. brucei in vitro* at  
31 picomolar concentrations. A single therapeutic dose (0.25 mg/kg) of a HpHbR  
32 antibody-PBD conjugate completely cured a *T. brucei* mouse infection within 2 days  
33 with no re-emergence of infection over a subsequent time course of 77 days. These  
34 experiments provide a demonstration of how ADCs can be exploited to treat  
35 protozoal diseases that desperately require new therapeutics.

36

## 37 **Author Summary**

38 Here we show that antibody-drug conjugates (ADCs) can be re-purposed from  
39 cancer immunotherapeutics to anti-protozoals by changing the specificity of the  
40 immunoglobulin to target a trypanosome cell surface receptor. Trypanosomes were  
41 used as a model system due to the availability of receptor null cell lines that allowed  
42 the unambiguous demonstration that ADCs targeted to a parasite surface receptor  
43 could be specifically internalised via receptor-mediated endocytosis. A single low  
44 dose of the resulting ADC was able to cure a stage 1 mouse model of trypanosome  
45 infection. We have used toxins and conjugation chemistry that are identical to anti-

46 cancer ADCs demonstrating the ability to piggy-back onto the huge research efforts  
47 and resources that are being invested in the development of such ADCs.

48 The potential for development of ADCs against a wide range of human pathogens is  
49 vast, where only epitope binding sites need vary in order to provide selectivity. This  
50 provides a far-reaching opportunity for the rapid development of novel anti-  
51 protozoals for the targeted killing of a wide range of pathogens that cause disease  
52 worldwide, especially in developing countries.

53

54

55

56

57

58

59

60

61

62

63

64

65

66

67

68

69

70

71 **Introduction**

72 Infection with African trypanosomes causes disease in humans, livestock and wild  
73 animals. At least seven species are able to infect livestock but only *Trypanosoma*  
74 *brucei* subspecies normally infect humans: *T. b. gambiense* and *T. b. rhodesiense*  
75 cause chronic or acute Human African Trypanosomiasis (HAT) respectively (1). New  
76 drug treatments are required for human treatment, the drugs currently used require  
77 multiple administrations over periods of weeks and all can have severe side effects  
78 (reviewed in (2-4)).

79

80 Without intervention, infection persists as the trypanosomes have evolved a  
81 population survival strategy based on antigenic variation of the variant surface  
82 glycoprotein (VSG) that is present as a densely packed coat on the external face of  
83 the plasma membrane. Receptors for host nutrient macromolecules are integrated in  
84 the VSG coat, such as the HpHbR which is involved in haem acquisition through  
85 binding and subsequent endocytosis of host haptoglobin-haemoglobin(5). Primate-  
86 specific innate immune protein complexes have evolved to exploit this nutrient  
87 uptake and kill most isolates of *T. brucei* (5). The two complexes, Trypanolytic Factor  
88 1 and 2 (TLF1 and TLF2), each contain two primate-specific proteins, apolipoprotein  
89 L1 (apoL-1) (6) and haptoglobin-related protein bound to haemoglobin (HprHb)  
90 which acts as a molecular mimic of HpHb(7-10). HpHbR binds and internalises TLF1  
91 and the toxin apoL-1 kills the trypanosome (5, 11). Human infective trypanosomes  
92 have evolved counter-measures to the TLFs(12-19).

93

94 The binding of a host macromolecule to a receptor, followed by the internalisation of  
95 the complex, provides a potential route to specifically deliver therapeutics into

96 trypanosome cells. Entry of TLF1 via the HpHbR and the release of a cytotoxin after  
97 internalisation is analogous to the mode of action of ADCs (20), a growing class of  
98 therapeutics, particularly used in applications in oncology(21-23) and also with  
99 demonstrated potential as anti-bacterials(24, 25). An early attempt to develop ADCs  
100 against the intracellular American trypanosome, *Trypanosoma cruzi*, used  
101 chlorambucil conjugated to polyclonal IgGs purified from chronically infected rabbits  
102 (26) and, while results were promising, this was only partially successful. More  
103 recently, antibody therapeutics against African trypanosomes based on single  
104 domain antibodies derived from camelid immunoglobulins (nanobodies) recognising  
105 some, but not all, VSGs (27, 28) have also been developed. One study used a  
106 nanobody apoL-1 fusion protein that was curative in mouse infections(29). In another  
107 two studies, nanobodies were used to create nanoparticles containing pentamidine,  
108 one of the current drugs used to treat trypanosome infection. These particles bound  
109 VSG and were successfully taken up into the endocytic pathway, the concentration  
110 required for cure was 10 to 100-fold lower than free pentamidine over a course of  
111 four doses (30, 31). However, the variability of the VSG molecules and underpinning  
112 antigenic variation will almost certainly limit their effectiveness as targets for  
113 therapeutic delivery.

114

115 Here we have developed a recombinant human anti-trypanosome-HpHbR antibody  
116 conjugated to a PBD toxin, selected so that recognition of the trypanosome would be  
117 independent of the VSG identity. This approach also strategically exploits advances  
118 in anti-cancer ADC development. The antibody-PBD conjugate was effective at  
119 killing trypanosomes in culture at picomolar concentrations whereas killing of human  
120 cell lines required more than 100,000-fold higher concentrations. A single low dose

121 (0.25 mg/kg) of one of the ADCs resulted in a long-term cure in the standard mouse  
122 model of trypanosome infection(32, 33) with no apparent adverse effects.

123

## 124 **Results**

125 HpHbR was chosen as a target for ADCs for two reasons: first it is responsible for  
126 receptor mediated endocytosis of ligands larger than IgGs and structural information  
127 suggested it is accessible to external antibodies (34, 35); second, a cell line with  
128 both HpHbR alleles deleted (HpHbR  $-/-$ ) was available as a control for specificity.  
129 HpHbR  $-/-$  cell lines have little or no growth phenotype in culture (5, 34), although  
130 they are attenuated in the murine experimental model of infection (5).

131

### 132 ***Identification of single chain variable fragments recognising the N-terminal*** 133 ***domain of the haptoglobin-haemoglobin receptor.***

134 In *T. brucei*, the mature HpHbR has a large N-terminal domain (264 residues) that  
135 contains the HpHb binding site (34) and a small C-terminal domain (79 residues)  
136 attached to the plasma membrane by a glycosylphosphatidylinositol anchor.  
137 Recombinant HpHbR N-terminal domain (34) was used for phage display affinity  
138 selection from a single chain variable fragment (scFv) library. Specificity for HpHbR  
139 was confirmed using phage ELISA and sixteen distinct scFvs were identified (Figure  
140 1A).

141

### 142 ***HpHbR antibodies are internalised by receptor mediated endocytosis***

143 Six of the scFvs (S1 Figure) were reformatted as human IgG1 for further analysis. To  
144 determine whether any of these IgGs were endocytosed by trypanosomes in a  
145 receptor dependent manner, each was labelled with Alexa fluor-594 and incubated

146 with either *Trypanosoma brucei*, Lister 427, HpHbR wild-type or HpHbR -/- cells in  
147 culture for 2 hours in the presence of the lysosomal protease inhibitor FMK-024. A  
148 control IgG1 with an unrelated specificity (NIP228) was used in parallel.  
149 Internalisation was monitored by microscopy (Figure 2) and at 10 nM IgG1 five of the  
150 six HpHbR antibodies were endocytosed by wild-type cells but not by HpHbR-/- cells  
151 and localised to a compartment consistent with the lysosome. There was no  
152 internalisation of the control antibody in either cell line at 10 nM. Hence, five of the  
153 antibodies were internalised by receptor mediated endocytosis demonstrating that  
154 they recognised epitopes on HpHbR that are accessible on live cells. The sixth  
155 HpHbR antibody (Tb086) showed limited internalisation and was not used further.

156

157 ***Toxin-conjugated HpHbR-targeting antibodies kill trypanosomes at picomolar***  
158 ***concentrations***

159 The receptor-mediated endocytosis of these HpHbR antibodies was then exploited to  
160 assess the effectiveness of ADCs against *T. brucei in vitro*. Two PBDs, SG3199 and  
161 SG3552 (ref(36)) (Figure 1B), were used in these experiments; each was used as a  
162 toxin-linker derivative, SG3249 and SG3376 respectively (Figure 1B), for antibody  
163 conjugation. PBDs are DNA minor groove binding toxins (37-40) and were chosen as  
164 trypanosomes have a highly complex mitochondrial genome formed from a network  
165 of thousands of concatenated DNA circles and are consequently susceptible to DNA  
166 binding toxins. This sensitivity is illustrated by the original patent on ethidium  
167 bromide as a treatment for trypanosome infection and ethidium derivatives are still  
168 used for animal trypanosomiasis (41, 42).

169

170 To assay for trypanocidal activity, cultures of *T. brucei* were incubated with a range  
171 of concentrations of the anti-HpHbR-PBD conjugates over 48 hours. Growth was  
172 measured as percentage proliferation compared to no treatment, with 0% relative to  
173 controls representing no viable cells observed, and IC<sub>50</sub> values calculated.

174

175 Initial experiments were designed to identify the most effective HpHbR antibody and  
176 used the PBD, SG3199. Free SG3199 had an IC<sub>50</sub> of ~1 pM (Figure 3A, Table S1),  
177 this confirmed its toxicity towards trypanosomes and indicated that it is freely cell  
178 permeable. Prior to conjugation to the IgGs, SG3199 was modified by the addition of  
179 a linker to facilitate conjugation and release in the lysosome after proteolysis to  
180 produce SG3249(43) (Figure 1B). Free SG3249 had an IC<sub>50</sub> of ~240 pM (Figure 3A,  
181 Table S1); presumably the hydrophilic nature of the linker meant that cell access via  
182 passive diffusion was reduced. Antibody-SG3249 conjugates were prepared for the  
183 five HpHbR antibodies selected in the uptake experiment above and the NIP228 IgG  
184 control, following IgG engineering to contain a surface exposed cysteine residue at  
185 position 239 in the heavy chain CH2 domain for conjugation to PBD molecules(44)  
186 (Figure 1B). The HpHbR antibody-SG3249 conjugates all killed trypanosomes with  
187 IC<sub>50</sub> values between 9 and 86 pM compared to 2100 pM for the control NIP228-  
188 SG3249 conjugate (Figure 3A and Table S1), demonstrating targeted cell killing by  
189 HpHbR antibody-PBD conjugates. The two most potent antibodies were Tb074 and  
190 Tb085 with IC<sub>50</sub> values of 17 and 9 pM respectively and they were selected for  
191 further experiments.

192

193 The next set of experiments used PBD SG3552 and its linker-derivative SG3376 (45,  
194 46) (Figure 1B). This toxin-linker combination was chosen as it was designed to have



195 fewer off-target effects (45, 47) and was shown to be more potent against  
196 trypanosomes in preliminary experiments. Three antibody-SG3376 conjugates were  
197 prepared from Tb074, Tb085 and NIP228 and all were tested for trypanocidal activity  
198 as above but using HpHbR wild type and -/- cell lines (Figure 3B and Table 1).  
199 SG3552 killed trypanosomes with IC<sub>50</sub> values of 0.14 pM in wild type and 0.2 pM in  
200 HpHbR -/- cell lines; the addition of the linker to make SG3376 reduced the toxicity to  
201 112 pM and 197 pM in wild type and -/- cell lines respectively, again presumably due  
202 to the increase in hydrophilicity conferred by the linker reducing passive cell entry.  
203 The antibody conjugates Tb085-SG3376 and Tb074-SG3376 were effective in killing  
204 wild-type trypanosomes with IC<sub>50</sub> values of 0.3 pM and 1.3 pM respectively. In  
205 contrast both were far less effective against HpHbR -/- cells with IC<sub>50</sub> values of 1390  
206 pM and 3270 pM showing that the action of the ADC is dependent on HpHbR  
207 expression. The action of the NIP228-SG3376 conjugate was unaffected by HpHbR  
208 expression and had an IC<sub>50</sub> of 3750 pM and 3000 pM in HpHbR wild type and -/-  
209 cells respectively. Taken together these findings showed that HpHbR antibody-  
210 SG3376 conjugates are highly effective in killing trypanosomes through a  
211 mechanism whereby the presence of the receptor increases specificity by several  
212 thousand-fold over the action of non-specific antibody-SG3376 conjugates.

213

214

215

216

217

218

219

| Cell line                           | IC <sub>50</sub> (pM)       |                                  |                            |
|-------------------------------------|-----------------------------|----------------------------------|----------------------------|
|                                     | <i>T. b. brucei</i>         | <i>T. b. brucei</i><br>HpHbR -/- | Human Jurkat               |
| <b>SG3552<br/>Toxin</b>             | <b>0.14</b><br>(0.11-0.18)  | <b>0.195</b><br>(0.14-0.27)      | <b>19.6</b><br>(10.8-35.8) |
| <b>SG3376<br/>Toxin plus linker</b> | <b>112</b><br>(76.7-163)    | <b>197</b><br>(145-268)          | <b>&gt;50,000</b>          |
| <b>NIP228-SG3376<br/>Control</b>    | <b>3750</b><br>(2610-5380)  | <b>3000</b><br>(2260-3960)       | <b>&gt;50,000</b>          |
| <b>Tb074-SG3376</b>                 | <b>1.33</b><br>(1.16-1.53)  | <b>3270</b><br>(2400-4450)       | <b>&gt;50,000</b>          |
| <b>Tb085-SG3376</b>                 | <b>0.297</b><br>(0.25-0.36) | <b>1390</b><br>(1030-1880)       | <b>&gt;50,000</b>          |

220

221 **Table 1: IC<sub>50</sub> values (pM) of SG3552-based toxins and ADCs against *T.brucei***

222 **cell lines and a human Jurkat cell line.** The IC<sub>50</sub> values of toxin SG3552, toxin plus  
223 linker SG3376, a control ADC (NIP228-SG3376) and two anti-trypanosome ADCs  
224 targeting the *T. b. brucei* HpHbR (Tb074-SG3376 and Tb085-SG3376) against *T. b*  
225 *brucei* wild type and *T. b brucei* HpHb -/- (Figure 3B) were calculated. Values in bold  
226 are best-fit IC<sub>50</sub> values, the range is the 95% confidence intervals. It was not possible  
227 to calculate accurate IC<sub>50</sub> values for the Jurkat cell line due to lack of saturation of  
228 the cell killing assay and so all were conservatively estimated as greater than 50 nM  
229 from the data in S2 Figure. All values are shown to 3 significant figures.

230

231 To assess whether the HpHbR antibody-SG3376 conjugates have specificity for  
232 trypanosomes over mammalian cells in culture, PBD toxin SG3552 and antibody-  
233 SG3376 conjugates were assessed for toxicity against a range of human cell lines.  
234 SG3552 was toxic to all cell lines assayed at picomolar concentrations (S3 Figure),  
235 the most sensitive was the Jurkat cell lines with an IC<sub>50</sub> value of 19.6 pM, around  
236 100-fold less-sensitive than the *T. brucei* cell lines (Table 1). This was expected:

237 trypanosomes are particularly sensitive to many DNA damaging toxins as described  
238 above. The NIP228-SG3376, Tb074-SG3376 and Tb085-SG3376 conjugates all had  
239 IC<sub>50</sub> values that were conservatively estimated to be >50 000 pM (S3 Figure). The  
240 IC<sub>50</sub> values of the two HpHbR antibody-SG3376 conjugates for the human cell lines  
241 was at least 50,000 times greater than those for trypanosomes (Table 1).

242

### 243 **A single Tb085-SG3376 administration results in the clearance of trypanosome** 244 **infection in mice**

245 Based on the specificity and potency observed in the above experiments, Tb085-  
246 SG3376 conjugate was chosen to determine anti-HpHbR-toxin conjugate efficacy in  
247 a mouse model of *T. b. brucei* infection. Mice were infected with a pleomorphic  
248 trypanosome cell line, *T. b. brucei* GVR35-VSL2, that expresses a luciferase  
249 transgene (PpyRE9h) to facilitate measurement of infection in live animals over a  
250 prolonged time course using bioluminescence imaging (BLI) (32, 33). This method  
251 has the advantage that it detects trypanosomes in the bloodstream and tissues.  
252 Fifteen mice were infected with trypanosomes and imaged on day 3 post infection to  
253 provide a pre-treatment BLI signal level indicative of the whole-body infection burden  
254 measured as photons per second (p/s) after administration of luciferase substrate.  
255 All infected mice had a total flux of between  $2.5 \times 10^9$  and  $5.9 \times 10^9$  p/s with the  
256 exception of a single mouse which had a lower level of infection at  $3 \times 10^7$  p/s.  
257 Subsequent to imaging, on day 3, groups of five mice were then treated with (1) 0.25  
258 mg/kg Tb085-SG3376 or (2) 0.25 mg/kg NIP228-SG3376 or (3) PBS alone. Three  
259 uninfected mice were used as negative controls for the BLI.

260

261 Infection levels were assessed by BLI on days 4, 5, 6 and 7, and then at regular  
262 further time points (Figure 4, S4 Figure, S5 Figure). Within the first day post-  
263 treatment the BLI signal in Tb085-SG3376-treated mice had dropped 3-fold relative  
264 to the pre-treatment signal whilst control mice (NIP228-SG3376 or PBS alone) had  
265 increased more than 2-fold. These control mice remained infected with a BLI signal  
266 consistent with a first and second wave of parasitaemia, characteristic of  
267 trypanosome infection dynamics (48, 49). At day 14 (11 days post-treatment), control  
268 mice were culled at a humane endpoint, as the BLI signal represented a parasite  
269 burden that would invariably lead to clinical symptoms of trypanosomiasis and death  
270 (33).

271

272 In contrast, the BLI signal in mice in group 1 (treated with Tb085-SG3376) had  
273 decreased to the level of uninfected controls by 2 days post-treatment. The BLI  
274 signal remained indistinguishable from the uninfected controls for 60 days post-  
275 treatment and the mice continued to appear healthy throughout the experiment, not  
276 showing any external symptoms of clinical trypanosomiasis. To determine if Tb085-  
277 SG3376 treated mice were harbouring very small numbers of trypanosomes that  
278 were kept in check by the mouse adaptive immune response, the mice were  
279 immunosuppressed with a single dose of cyclophosphamide on day 66 post-infection  
280 and BLI measurements made on days 69, 74, 76 and 80 post-infection; no  
281 trypanosomes were detected (Figure 4, S4 Figure, S5 Figure). On day 80 post-  
282 infection mice were culled and BLI was performed on mouse tissues post-necropsy;  
283 again no trypanosomes were detected in any tissue (S6 Figure). Finally, both a blood  
284 sample and a section of brain tissue from each of the five mice treated with Tb085-  
285 SG3376 were incubated in trypanosome culture medium for one month; in no case

286 were any trypanosomes then detected. Together, these observations and  
287 measurements indicate that a single dose of Tb085-SG3376 was sufficient to cure  
288 infection in 5/5 mice in the experimental group.

289

## 290 **Discussion**

291 African trypanosomes proliferate in the bloodstream and tissue spaces of their  
292 mammalian hosts where they are continually exposed to the adaptive immune  
293 response. The trypanosome cell surface is covered by a densely packed coat of  
294 VSG that underpins persistence of infection by antigenic variation. The VSG coat  
295 must be permissive for receptor mediated endocytosis of host macromolecules as  
296 nutrients and here this has been exploited for the delivery of an ADC. The HpHbR  
297 was chosen for this study as: (i) it is a natural route for uptake of the trypanolytic  
298 factors(5), which kill sensitive trypanosomes strains in human serum; (ii) it is  
299 accessible to ligands larger than IgG (5); (iii) it has a known structure (34, 35); (iv)  
300 HpHbR null cell lines grow at a normal rate in culture (5, 34) and were an ideal  
301 control for specificity of uptake. We found that HpHbR monoclonal antibodies are  
302 taken up into HpHbR wild type cells but not HpHbR  $-/-$  cells, proving that receptors for  
303 host macromolecules are accessible on live trypanosomes. These same antibodies  
304 conjugated to a PBD were able to kill trypanosomes in culture at pM concentration in  
305 a manner that was dependent on HpHbR expression. Significantly higher doses,  
306 were needed to kill a panel of mammalian cell lines. Finally, in the mouse model of  
307 infection, a single administration of an anti-HpHbR ADC was sufficient to cure the  
308 infection.

309

310 The findings here have validated an approach that builds on the considerable  
311 progress in anti-cancer ADCs and repurposing into an anti-protozoal simply involves  
312 the development of pathogen specific antibodies. The use of ADCs here was  
313 specifically based on those developed in oncology. Currently, ADCs are used in the  
314 clinic against Hodgkin lymphoma (Brentuximab vedotin) (22) and HER2-positive  
315 breast cancer (ado-trastuzumab-emtansine) (50). Many others are in pre-clinical  
316 development or clinical trials, including ADCs against a range of cancers that  
317 incorporate PBDs, including SG3249, one of the toxins used in this study (51-53).

318

319 The success of the experiments above lead to the question of whether this is a  
320 realistic approach for development of therapeutics for trypanosome and other  
321 protozoan infections. Amongst the key challenges in generating ADCs for  
322 applications in oncology is ensuring minimal off-target toxicity and so, as well as  
323 through ADC chemistry, low doses are desirable (reviewed in (54)). The single dose  
324 of 0.25 mg/kg was selected in these experiments as a proof-of-concept because it is  
325 at the lower end of effective oncological ADC treatment in mice(55) and is well below  
326 the anticipated maximum tolerated dose (56). The minimum efficacious dose  
327 achievable with the anti-HpHbR ADC was not tested in this study and it is likely that  
328 the targeting of parasites will be achieved using lower doses than required for  
329 oncology for two key reasons. First, in contrast to the surface of cancer cells,  
330 parasite-specific surface receptors are entirely different from host cell surface  
331 receptors leading to highly selective uptake of the antibody into the pathogen.  
332 Second, the effectiveness of the ADC in this study was enhanced by the sensitivity  
333 of trypanosomes to DNA-binding agents, in comparison to host cells. Together these  
334 led to a 100,000-fold difference in toxicity between trypanosome and human cells *in*

335 *vitro*. These considerations will also apply to other protozoal pathogens providing a  
336 suitable target can be identified.

337

338 Disease caused by *T. brucei* infection has two stages: in stage 1 trypanosomes are  
339 excluded from the central nervous system (CNS) by the blood brain barrier (BBB)  
340 while in stage 2 infections trypanosomes enter the CNS. In the experimental model  
341 used here, we have tested the ability to clear a stage 1 infection. Would ADCs be  
342 able to target trypanosomes in the CNS? While administered intravenous antibodies  
343 are present in the CNS at less than 0.1% of the concentration in the blood in murine  
344 models (57, 58) increased BBB permeability has been observed in murine models of  
345 neurological-stage trypanosomiasis (59-61), which will increase the CNS  
346 concentration of administered antibodies. Further, bifunctional fusion antibodies that  
347 can cross the blood-brain barrier have been reported (57).

348

349 It is worth contrasting a potential ADC treatment with the current effective drug  
350 regimens for trypanosomiasis. Pentamidine, the current stage 1 *T. b. gambiense*  
351 treatment, is administered to patients intramuscularly at 4 mg/kg over 7 days,  
352 although it has been shown to clear a mouse model of *T. b. brucei* infection at 2.5  
353 mg/kg over four intraperitoneal injections (30, 62). For stage 2 *T. b. gambiense*  
354 infection, the current nifurtimox eflornithine combination therapy involves oral  
355 nifurtimox 15 mg/kg/day for 10 days plus eflornithine infusions 400 mg/kg/day for 7  
356 days (for a 50 kg adult this is 20 g eflornithine per day) (63). A single dose of ADC  
357 would clearly be an improvement.

358

359 Considerable resources are being used for the optimisation, assessment and clinical  
360 trials of oncology ADCs. It is difficult to imagine such resources being available for  
361 the developmental pipeline of therapeutics against protozoal pathogens that primarily  
362 affect developing countries. Both cancer and protozoal pathogens are eukaryotic  
363 cells and so the oncology-based strategies that take advantage of the cell biology of  
364 cancer cells are often applicable to protozoa. Therefore, the scope for benefiting  
365 from oncology developments is clear, particularly where the drug (such as PBDs, as  
366 used in this study) do not deviate from oncology ADCs that are under development.  
367 If simply modifying the epitope binding site can allow anti-cancer ADCs to be  
368 repurposed then they could realistically be developed as a novel class of  
369 therapeutics for protozoan pathogens. The cell surfaces of protozoan pathogens are  
370 often particularly well studied due to the biological interest in their role in  
371 host:parasite interactions and therefore the literature contains a reservoir of potential  
372 targets (for example (64-68)). It is also worth noting that the production cost of ADCs  
373 is far less than often realised (69-73).

374

375 In summary, we have demonstrated that a single dose of an ADC, shown to  
376 specifically operate through the HpHbR was able to completely cure an infection in a  
377 stage 1 trypanosomiasis model. These type of agents have the potential for  
378 development for use to treat trypanosome infection in humans, and in the longer  
379 term livestock animals. Furthermore, this work illustrates that developments in  
380 oncology ADCs can be applied to protozoal pathogens, the causal agents of many  
381 neglected diseases in need of new therapeutics.

382

383



## 384 **Materials and Methods**

### 385 ***Phage display selection of anti-HpHbR N-terminal domain single chain variable*** 386 ***fragments***

387 Recombinant HpHbR N-terminal domain (NTD) was expressed as previously  
388 described (34) and a scFv antibody library was used to perform soluble and panning  
389 phage display selections (74). Briefly, panning selections were performed by coating  
390 5 µg/mL biotinylated HpHbR NTD on to a single well of a streptavidin-coated 96-well  
391 plate or 10 µg/mL non-biotinylated HpHbR NTD on to a single well of a Nunc  
392 Maxisorp plate overnight at 4°C. Coated wells were washed three times with  
393 phosphate buffered saline (PBS) prior to incubation for 1hr at room temperature with  
394 3% Marvel skimmed milk powder in PBS. Next,  $1 \times 10^{12}$  phage particles in 6% Marvel  
395 in PBS were added to each coated well and incubated for 1hr at room temperature.  
396 The wells were washed five times with PBS containing 0.1% Tween-20 and five  
397 times with PBS prior to elution and recovery of phage. For soluble selection, phage  
398 were pre-incubated with magnetic beads in 3% Marvel in PBS at room temperature  
399 for 1 hour. Subsequently, the magnetic beads were removed and the phage-  
400 containing supernatant was incubated with biotinylated HpHbR NTD at room  
401 temperature for 1 hour. Streptavidin magnetic beads were subsequently added to the  
402 reaction and incubated at room temperature for 5 minutes. The magnetic beads were  
403 washed five times with 0.1% Tween-20 in PBS. For all selections, phage were eluted  
404 with 10 µg/ml trypsin in PBS for 30 minutes at 37°C. Exponentially grown TG1 *E.coli*  
405 cells were infected with the eluted phage and grown overnight at 30°C on agar plates  
406 containing ampicillin. *E. coli* colonies were harvested from the bioassay plates and  
407 phage particles were rescued by super-infecting with M13 KO7 helper phage and

408 used in the next round of selection. In total, three serial rounds of selection were  
409 performed.

410

#### 411 ***Phage ELISA***

412 Individual phage were produced from *E. coli* and assayed, by phage ELISA, against  
413 TbHpHbR NTD in parallel with BSA and streptavidin. Briefly, 10 µg/ml of each  
414 protein was coated onto Nunc Maxisorp plates and 5µg/mL of each biotinylated  
415 protein was coated onto streptavidin-coated plates overnight at 4°C. Plates were  
416 washed three times with PBS before being incubated with 3% Marvel in PBS for 1  
417 hour at room temperature. Phage containing supernatants were blocked with an  
418 equal volume of 6% Marvel in 2xPBS for 1 hour at room temperature. Coated plates  
419 were washed three times with PBS and incubated with 50 µl of blocked phage  
420 supernatants for 1hr at room temperature. Plates were washed three times with  
421 0.1% Tween 20 in PBS and bound phage were detected using an anti-M13  
422 horseradish peroxidase conjugated antibody and colorimetric substrate. Rabbit  
423 polyclonal anti-TbHpHbR antibody was used as a positive control and detected with  
424 mouse anti-rabbit IgG HRP.

425

#### 426 ***Generation of full length human IgG1 and THIOMABS***

427 Selected scFvs were converted to full length human IgG1s using standard molecular  
428 biology techniques. Plasmids encoding secreted antibody (75) were purified by  
429 protein A affinity chromatography. Recombinant antibody was labelled with Alexa  
430 Fluor 594 following the manufacturer's instructions (Life technologies). Standard  
431 molecular biology techniques were used to introduce a cysteine residue at position

432 239 in the CH2 domain of each heavy chain (44). Recombinant THIOMABs were  
433 expressed and purified as detailed for full length IgG1.

434

#### 435 ***PBD conjugation to THIOMABs***

436 The HpHbR THIOMABs and a NIP228 negative control were reduced by the  
437 addition of a forty fold molar excess of tris(2-carboxyethyl)phosphine (TCEP) in PBS,  
438 1 mM EDTA, pH 7.2 for 4 h at 37°C. TCEP was subsequently removed and the  
439 THIOMABs were re-oxidised with a twenty times molar excess of dehydroascorbic  
440 acid for 4h at 25°C. A ten times molar excess of toxin plus linker was added and  
441 incubated for 1 h at 25 °C, the reactions were quenched by the addition of excess of  
442 N-acetyl-L-cysteine. The resultant ADCs were formulated in PBS, pH 7.2 after  
443 ultrafiltration to removed excess toxin. ADCs were characterized by determination of  
444 monomeric purity by size exclusion chromatography (Table S2), drug-antibody-ratio  
445 (DAR) by RP-HPLC chromatography (Table S2) and molecular mass (by LC-MS of  
446 the reduced ADCs) (S5 Figure)

447

#### 448 ***Trypanosome cell culture***

449 *T. b. brucei* Lister 427 bloodstream cells were grown in HMI-9 salts plus 10% foetal  
450 calf serum (FCS) at 37°C with 5% CO<sub>2</sub> (76). The *T. b. brucei* Lister 427 HpHbR -/-  
451 cell line used here has been described previously (34).

452

#### 453 ***Internalisation of fluorescently labelled IgGs into live cells***

454 For *T. b. brucei* uptake assays 1 x 10<sup>6</sup> cells per assay were incubated with 10 nM  
455 Alexa Fluor 594-labelled IgG in 300µl HMI-9, 10% FCS, 2µM FMK-024 protease  
456 inhibitor for 1.5 hours at 37°C. Cells were washed once in HMI-9, 10% FCS then

457 fixed in 1% PFA for 10 minutes at room temperature and resuspended in PBS.  
458 Internalisation was determined by microscopy using a Zeiss Imager M1 microscope  
459 and analysed with AxioVision Rel 4.8 software.

460

#### 461 ***In vitro trypanosome cell-killing assays***

462 *T. b. brucei* Lister 427 wild-type or HpHbR -/- cell lines were incubated at  $1 \times 10^4$   
463 cells/ml in triplicate with PBDs or ADCs for 48 hours before cells were counted and  
464 growth was calculated relative to an untreated control for each cell line. All assays  
465 contained 0.5% DMSO. Data were  $\text{Log}_{10}$  transformed and nonlinear regression lines  
466 of best fit and  $\text{IC}_{50}$  values were calculated using GraphPad Prism 6.

467

#### 468 ***CellTiter-Glo Luminescent Cell Viability Assay***

469 *In vitro* viability cell assays were performed with primary and transformed human cell  
470 lines: Raji (ECACC), Jurkat E6.1 (ATCC), NHLF (LONZA) and HUVEC (LONZA).  
471 These cell lines were mycoplasma tested and authenticated by PCR using human  
472 16-marker short tandem repeat profiling and interspecies contamination test by  
473 IDEXX (Columbia, MO). Cells seeded at  $2 \times 10^5$  cell/ml (Raji and Jurkat) and at  $2 \times$   
474  $10^3$  cell/ml (NHLF and HUVEC) in 96 well plates were incubated with the SG3552  
475 toxin, the toxin+linker SG3376 and the corresponding ADCs (Tb074-SG3376,  
476 Tb085-SG3376 and NIP228-SG3376). All assays contained 0.5% DMSO. After 96  
477 hours, the number of viable cells in culture was measured using the CellTiter-Glo 2.0  
478 luminescent cell viability assay and read in Envision plate reader. Growth was  
479 calculated relative to an untreated control for each cell line. Data were  $\text{Log}_{10}$   
480 transformed and nonlinear regression lines of best fit and  $\text{IC}_{50}$  values were  
481 calculated, where possible using GraphPad Prism 6.

482

483 **Mouse infection and bioluminescent imaging of trypanosome infection**

484 Pleomorphic *T. b. brucei* GVR35-VSL2 bloodstream forms were cultured and  
485 maintained at 37°C/5%CO<sub>2</sub> in HMI-9 medium supplemented with 20% FBS, 1µg/ml  
486 puromycin and 1% methyl cellulose (33). Parasites were maintained at <1 x 10<sup>6</sup> ml<sup>-1</sup>  
487 and were not cultured for more than three passages prior to mouse infection.

488

489 Mice were purchased from Charles River (UK). They were maintained under specific  
490 pathogen-free conditions in individually ventilated cages with a 12 hour light/dark  
491 cycle and access to food and water *ad libitum*. Female BALB/c mice aged 8 to 12  
492 weeks were infected intraperitoneally with 3x10<sup>4</sup> *T. b. brucei* GVR35-VSL2 cells (33).  
493 Three groups of five mice were infected. On day 3 post infection the mice were  
494 imaged to obtain the pre-treatment infection level. Five mice received 0.25 mg/kg  
495 Tb085-SG3376, five mice received PBS alone and five mice received 0.25 mg/kg  
496 NIP288, all intravenously. A group of three mice was not infected.

497

498 Imaging was carried out by intraperitoneal injection of 150 mg/kg D-luciferin. After 5  
499 minutes, mice were anaesthetised with 2.5% (v/v) gaseous isoflurane in oxygen.  
500 The mice were transferred to the IVIS Illumina and imaged using LivingImage 4.3.  
501 software (PerkinElmer). Exposure times were determined automatically and varied  
502 between 0.5 s and 5 min depending on the radiance. After imaging, mice were  
503 allowed to recover and transferred back to their cages.

504

505 At 66 days post-infection, Tb085-SG3376 treated mice were immunosuppressed  
506 with a single intraperitoneal dose of cyclophosphamide (200 mg/kg).

507

508 **Ethics statement**

509 All animal work was performed under UK Home Office licence 70/8207 and  
510 approved by the London School of Hygiene and Tropical Medicine Animal Welfare  
511 and Ethical Review Board. All protocols and procedures were conducted in  
512 accordance with the UK Animals (Scientific Procedures) Act 1986.

513

514 **Acknowledgments**

515 This work was supported by Medical Research Council Project Grant MR/L008246 to  
516 MC and MH. PM is a BBSRC David Phillips Fellow (BB/P010849/1).

517

518 **Competing Financial Interests Statement**

519 A.L.G.M., S.R., A.M.S., T.J.V. and R.M. are employees of Medimmune. F.D., C.S.B.  
520 and P.H. are employees of Spirogen. Toxins SG3199/SG3249 and SG3552/SG3376  
521 are subject to international patents, WO 2011/130598 A1 and WO 2014/140862 A2,  
522 respectively (77, 78).

## 523 References

- 524 1. WHO. Human African trypanosomiasis in Working to overcome the global impact of  
525 neglected tropical diseases. First WHO report on neglected tropical diseases. 2010;1(1):82-9.
- 526 2. Kennedy PG. Clinical features, diagnosis, and treatment of human African trypanosomiasis  
527 (sleeping sickness). *Lancet Neurol.* 2013;12(2):186-94.
- 528 3. Field MC, Horn D, Fairlamb AH, Ferguson MAJ, Gray DW, Read KD, et al. Anti-trypanosomatid  
529 drug discovery: an ongoing challenge and a continuing need. *Nat Rev Microbiol.* 2017;15(7):447.
- 530 4. Babokhov P, Sanyaolu AO, Oyibo WA, Fagbenro-Beyioku AF, Iriemenam NC. A current  
531 analysis of chemotherapy strategies for the treatment of human African trypanosomiasis. *Pathog*  
532 *Glob Health.* 2013;107(5):242-52.
- 533 5. Vanhollebeke B, De Muylder G, Nielsen MJ, Pays A, Tebabi P, Dieu M, et al. A haptoglobin-  
534 hemoglobin receptor conveys innate immunity to *Trypanosoma brucei* in humans. *Science.*  
535 2008;320(5876):677-81.
- 536 6. Vanhamme L, Paturiaux-Hanocq F, Poelvoorde P, Nolan DP, Lins L, Van Den Abbeele J, et al.  
537 Apolipoprotein L-I is the trypanosome lytic factor of human serum. *Nature.* 2003;422(6927):83-7.
- 538 7. Hajduk SL, Moore DR, Vasudevacharya J, Siqueira H, Torri AF, Tytler EM, et al. Lysis of  
539 *Trypanosoma brucei* by a toxic subspecies of human high density lipoprotein. *J Biol Chem.*  
540 1989;264(9):5210-7.
- 541 8. Raper J, Nussenzweig V, Tomlinson S. The main lytic factor of *Trypanosoma brucei brucei* in  
542 normal human serum is not high density lipoprotein. *J Exp Med.* 1996;183(3):1023-9.
- 543 9. Rifkin MR. Identification of the trypanocidal factor in normal human serum: high density  
544 lipoprotein. *Proc Natl Acad Sci U S A.* 1978;75(7):3450-4.
- 545 10. Tomlinson S, Jansen AM, Koudinov A, Ghiso JA, Choi-Miura NH, Rifkin MR, et al. High-  
546 density-lipoprotein-independent killing of *Trypanosoma brucei* by human serum. *Mol Biochem*  
547 *Parasitol.* 1995;70(1-2):131-8.
- 548 11. Bullard W, Kieft R, Capewell P, Veitch NJ, Macleod A, Hajduk SL. Haptoglobin-hemoglobin  
549 receptor independent killing of African trypanosomes by human serum and trypanosome lytic  
550 factors. *Virulence.* 2012;3(1):72-6.
- 551 12. Capewell P, Clucas C, DeJesus E, Kieft R, Hajduk S, Veitch N, et al. The TgsGP gene is essential  
552 for resistance to human serum in *Trypanosoma brucei gambiense*. *PLoS Pathog.*  
553 2013;9(10):e1003686.
- 554 13. DeJesus E, Kieft R, Albright B, Stephens NA, Hajduk SL. A single amino acid substitution in the  
555 group 1 *Trypanosoma brucei gambiense* haptoglobin-hemoglobin receptor abolishes TLF-1 binding.  
556 *PLoS Pathog.* 2013;9(4):e1003317.
- 557 14. Higgins MK, Tkachenko O, Brown A, Reed J, Raper J, Carrington M. Structure of the  
558 trypanosome haptoglobin-hemoglobin receptor and implications for nutrient uptake and innate  
559 immunity. *Proc Natl Acad Sci U S A.* 2013;110(5):1905-10.
- 560 15. Kieft R, Capewell P, Turner CM, Veitch NJ, MacLeod A, Hajduk S. Mechanism of *Trypanosoma*  
561 *brucei gambiense* (group 1) resistance to human trypanosome lytic factor. *Proc Natl Acad Sci U S A.*  
562 2010;107(37):16137-41.
- 563 16. Symula RE, Beadell JS, Sstrom M, Agbebakun K, Balmer O, Gibson W, et al. *Trypanosoma*  
564 *brucei gambiense* group 1 is distinguished by a unique amino acid substitution in the HpHb receptor  
565 implicated in human serum resistance. *PLoS Negl Trop Dis.* 2012;6(7):e1728.
- 566 17. Uzureau P, Uzureau S, Lecordier L, Fontaine F, Tebabi P, Homble F, et al. Mechanism of  
567 *Trypanosoma brucei gambiense* resistance to human serum. *Nature.* 2013;501(7467):430-4.
- 568 18. De Greef C, Hamers R. The serum resistance-associated (SRA) gene of *Trypanosoma brucei*  
569 *rhodesiense* encodes a variant surface glycoprotein-like protein. *Mol Biochem Parasitol.*  
570 1994;68(2):277-84.

- 571 19. Xong HV, Vanhamme L, Chamekh M, Chimfwembe CE, Van Den Abbeele J, Pays A, et al. A  
572 VSG expression site-associated gene confers resistance to human serum in *Trypanosoma*  
573 *rhodesiense*. *Cell*. 1998;95(6):839-46.
- 574 20. Alsford S, Field MC, Horn D. Receptor-mediated endocytosis for drug delivery in African  
575 trypanosomes: fulfilling Paul Ehrlich's vision of chemotherapy. *Trends Parasitol*. 2013;29(5):207-12.
- 576 21. Lambert JM, Chari RV. Ado-trastuzumab Emtansine (T-DM1): an antibody-drug conjugate  
577 (ADC) for HER2-positive breast cancer. *J Med Chem*. 2014;57(16):6949-64.
- 578 22. Senter PD, Sievers EL. The discovery and development of brentuximab vedotin for use in  
579 relapsed Hodgkin lymphoma and systemic anaplastic large cell lymphoma. *Nat Biotechnol*.  
580 2012;30(7):631-7.
- 581 23. Younes A, Yasothan U, Kirkpatrick P. Brentuximab vedotin. *Nat Rev Drug Discov*.  
582 2012;11(1):19-20.
- 583 24. Lehar SM, Pillow T, Xu M, Staben L, Kajihara KK, Vandlen R, et al. Novel antibody-antibiotic  
584 conjugate eliminates intracellular *S. aureus*. *Nature*. 2015;527(7578):323-8.
- 585 25. Zhou C, Lehar S, Gutierrez J, Rosenberger CM, Ljumanovic N, Dinoso J, et al.  
586 Pharmacokinetics and pharmacodynamics of DSTA4637A: A novel THIOMAB antibody antibiotic  
587 conjugate against *Staphylococcus aureus* in mice. *MAbs*. 2016;8(8):1612-9.
- 588 26. Carvalhaes MS, Santana JM, Nobrega OT, Aragao JB, Grellier P, Schrevel J, et al.  
589 Chemotherapy of an experimental *Trypanosoma cruzi* infection with specific immunoglobulin-  
590 chlorambucil conjugate. *Lab Invest*. 1998;78(6):707-14.
- 591 27. Stijlemans B, Conrath K, Cortez-Retamozo V, Van Xong H, Wyns L, Senter P, et al. Efficient  
592 targeting of conserved cryptic epitopes of infectious agents by single domain antibodies. African  
593 trypanosomes as paradigm. *J Biol Chem*. 2004;279(2):1256-61.
- 594 28. Stijlemans B, De Baetselier P, Caljon G, Van Den Abbeele J, Van Ginderachter JA, Magez S.  
595 Nanobodies As Tools to Understand, Diagnose, and Treat African Trypanosomiasis. *Front Immunol*.  
596 2017;8:724.
- 597 29. Baral TN, Magez S, Stijlemans B, Conrath K, Vanhollebeke B, Pays E, et al. Experimental  
598 therapy of African trypanosomiasis with a nanobody-conjugated human trypanolytic factor. *Nat*  
599 *Med*. 2006;12(5):580-4.
- 600 30. Arias JL, Unciti-Broceta JD, Maceira J, Del Castillo T, Hernandez-Quero J, Magez S, et al.  
601 Nanobody conjugated PLGA nanoparticles for active targeting of African Trypanosomiasis. *J Control*  
602 *Release*. 2015;197:190-8.
- 603 31. Unciti-Broceta JD, Arias JL, Maceira J, Soriano M, Ortiz-Gonzalez M, Hernandez-Quero J, et  
604 al. Specific Cell Targeting Therapy Bypasses Drug Resistance Mechanisms in African Trypanosomiasis.  
605 *PLoS Pathog*. 2015;11(6):e1004942.
- 606 32. Burrell-Saward H, Rodgers J, Bradley B, Croft SL, Ward TH. A sensitive and reproducible in  
607 vivo imaging mouse model for evaluation of drugs against late-stage human African trypanosomiasis.  
608 *J Antimicrob Chemother*. 2015;70(2):510-7.
- 609 33. McLatchie AP, Burrell-Saward H, Myburgh E, Lewis MD, Ward TH, Mottram JC, et al. Highly  
610 sensitive in vivo imaging of *Trypanosoma brucei* expressing "red-shifted" luciferase. *PLoS Negl Trop*  
611 *Dis*. 2013;7(11):e2571.
- 612 34. Lane-Serff H, MacGregor P, Lowe ED, Carrington M, Higgins MK. Structural basis for ligand  
613 and innate immunity factor uptake by the trypanosome haptoglobin-haemoglobin receptor. *Elife*.  
614 2014;3:e05553.
- 615 35. Stodkilde K, Torvund-Jensen M, Moestrup SK, Andersen CB. Structural basis for  
616 trypanosomal haem acquisition and susceptibility to the host innate immune system. *Nat Commun*.  
617 2014;5:5487.
- 618 36. Tiberghien TC, Patel, N.V., Vijayakrishnan, B., Adams, L., Arora, N., Corbett, S., Bertelli, F.,  
619 Barry, C., Masterson, L., Hartley, J.A., Howard, P.W. Influence of Tether Variations on the Biological  
620 Activity of Tesirine Analogues. Poster Abstract: EORTC-NCI-AACR Annual Meeting. 2018(PB-  
621 027):14th November.



- 622 37. Millan CR, Acosta-Reyes FJ, Lagartera L, Ebiloma GU, Lemgruber L, Nue Martinez JJ, et al.  
623 Functional and structural analysis of AT-specific minor groove binders that disrupt DNA-protein  
624 interactions and cause disintegration of the *Trypanosoma brucei* kinetoplast. *Nucleic Acids Res.*  
625 2017;45(14):8378-91.
- 626 38. Scott FJ, Khalaf AI, Giordani F, Wong PE, Duffy S, Barrett M, et al. An evaluation of Minor  
627 Groove Binders as anti-*Trypanosoma brucei* therapeutics. *Eur J Med Chem.* 2016;116:116-25.
- 628 39. Hartley JA, Flynn MJ, Bingham JP, Corbett S, Reinert H, Tiberghien A, et al. Pre-clinical  
629 pharmacology and mechanism of action of SG3199, the pyrrolobenzodiazepine (PBD) dimer warhead  
630 component of antibody-drug conjugate (ADC) payload tesirine. *Sci Rep.* 2018;8(1):10479.
- 631 40. Mantaj J, Jackson PJ, Rahman KM, Thurston DE. From Anthramycin to Pyrrolobenzodiazepine  
632 (PBD)-Containing Antibody-Drug Conjugates (ADCs). *Angew Chem Int Ed Engl.* 2017;56(2):462-88.
- 633 41. Holmes PH, Eisler MC, Geerts S. Current chemotherapy of Animal Trypanosomiasis. *The*  
634 *trypanosomiasis*: edited by I Maudlin, PH Holmes, MA Miles. 2004:431-44.
- 635 42. Roy Chowdhury A, Bakshi R, Wang J, Yildirim G, Liu B, Pappas-Brown V, et al. The killing of  
636 African trypanosomes by ethidium bromide. *PLoS Pathog.* 2010;6(12):e1001226.
- 637 43. Tiberghien AC, Levy JN, Masterson LA, Patel NV, Adams LR, Corbett S, et al. Design and  
638 Synthesis of Tesirine, a Clinical Antibody-Drug Conjugate Pyrrolobenzodiazepine Dimer Payload. *ACS*  
639 *Med Chem Lett.* 2016;7(11):983-7.
- 640 44. Dimasi N, Fleming R, Zhong H, Bezabeh B, Kinneer K, Christie RJ, et al. Efficient Preparation  
641 of Site-Specific Antibody-Drug Conjugates Using Cysteine Insertion. *Mol Pharm.* 2017;14(5):1501-16.
- 642 45. Tiberghien AC, Gregson SJ, Masterson LA, Levy JN, Kemp GC, Adams LR, et al. An optimised  
643 synthesis of SG3376, a non-cleavable antibody-drug conjugate pyrrolobenzodiazepine drug-linker.  
644 *Tetrahedron Lett.* 2017;58(46):4363-6.
- 645 46. Gregson SJ, Masterson LA, Wei B, Pillow TH, Spencer SD, Kang GD, et al.  
646 Pyrrolobenzodiazepine Dimer Antibody-Drug Conjugates: Synthesis and Evaluation of Noncleavable  
647 Drug-Linkers. *J Med Chem.* 2017;60(23):9490-507.
- 648 47. Kinneer K, Meekin J, Tiberghien AC, Tai YT, Phipps S, Kiefer CM, et al. SLC46A3 as a Potential  
649 Predictive Biomarker for Antibody-Drug Conjugates Bearing Noncleavable Linked Maytansinoid and  
650 Pyrrolobenzodiazepine Warheads. *Clin Cancer Res.* 2018.
- 651 48. Mugnier MR, Cross GA, Papavasiliou FN. The in vivo dynamics of antigenic variation in  
652 *Trypanosoma brucei*. *Science.* 2015;347(6229):1470-3.
- 653 49. MacGregor P, Savill NJ, Hall D, Matthews KR. Transmission stages dominate trypanosome  
654 within-host dynamics during chronic infections. *Cell Host Microbe.* 2011;9(4):310-8.
- 655 50. Verma S, Miles D, Gianni L, Krop IE, Welslau M, Baselga J, et al. Trastuzumab emtansine for  
656 HER2-positive advanced breast cancer. *N Engl J Med.* 2012;367(19):1783-91.
- 657 51. Beck A, Goetsch L, Dumontet C, Corvaia N. Strategies and challenges for the next generation  
658 of antibody-drug conjugates. *Nat Rev Drug Discov.* 2017;16(5):315-37.
- 659 52. Rudin CM, Pietanza MC, Bauer TM, Ready N, Morgensztern D, Glisson BS, et al.  
660 Rovalpituzumab tesirine, a DLL3-targeted antibody-drug conjugate, in recurrent small-cell lung  
661 cancer: a first-in-human, first-in-class, open-label, phase 1 study. *Lancet Oncol.* 2017;18(1):42-51.
- 662 53. Zammarchi F, Corbett S, Adams L, Tyrer PC, Kiakos K, Janghra N, et al. ADCT-402, a PBD  
663 dimer-containing antibody drug conjugate targeting CD19-expressing malignancies. *Blood.*  
664 2018;131(10):1094-105.
- 665 54. Donaghy H. Effects of antibody, drug and linker on the preclinical and clinical toxicities of  
666 antibody-drug conjugates. *MAbs.* 2016;8(4):659-71.
- 667 55. Monks NR, Schifferli, K.P., Tammali, R., Borrok, M.J., Coats, S. R., Herbst, R., Tice, D.A., and  
668 Pore, N. Abstract LB-295: MEDI7247, a novel pyrrolobenzodiazepine ADC targeting ASCT2 with  
669 potent in vivo activity across a spectrum of hematological malignancies. *AACR Annual Meeting 2018;*  
670 *. 2018;April 14-18, 2018; Chicago, IL.*

- 671 56. Harper J, Lloyd C, Dimasi N, Toader D, Marwood R, Lewis L, et al. Preclinical Evaluation of  
672 MEDI0641, a Pyrrolobenzodiazepine-Conjugated Antibody-Drug Conjugate Targeting 5T4. *Mol*  
673 *Cancer Ther.* 2017;16(8):1576-87.
- 674 57. Boado RJ, Zhou QH, Lu JZ, Hui EK, Pardridge WM. Pharmacokinetics and brain uptake of a  
675 genetically engineered bifunctional fusion antibody targeting the mouse transferrin receptor. *Mol*  
676 *Pharm.* 2010;7(1):237-44.
- 677 58. Pepinsky RB, Shao Z, Ji B, Wang Q, Meng G, Walus L, et al. Exposure levels of anti-LINGO-1  
678 Li81 antibody in the central nervous system and dose-efficacy relationships in rat spinal cord  
679 remyelination models after systemic administration. *J Pharmacol Exp Ther.* 2011;339(2):519-29.
- 680 59. Caljon G, Caveliers V, Lahoutte T, Stijlemans B, Ghassabeh GH, Van Den Abbeele J, et al.  
681 Using microdialysis to analyse the passage of monovalent nanobodies through the blood-brain  
682 barrier. *Br J Pharmacol.* 2012;165(7):2341-53.
- 683 60. Philip KA, Dascombe MJ, Fraser PA, Pentreath VW. Blood-brain barrier damage in  
684 experimental African trypanosomiasis. *Ann Trop Med Parasitol.* 1994;88(6):607-16.
- 685 61. Rodgers J, McCabe C, Gettinby G, Bradley B, Condon B, Kennedy PG. Magnetic resonance  
686 imaging to assess blood-brain barrier damage in murine trypanosomiasis. *Am J Trop Med Hyg.*  
687 2011;84(2):344-50.
- 688 62. Thuita JK, Karanja SM, Wenzler T, Mdachi RE, Ngotho JM, Kagira JM, et al. Efficacy of the  
689 diamidine DB75 and its prodrug DB289, against murine models of human African trypanosomiasis.  
690 *Acta Trop.* 2008;108(1):6-10.
- 691 63. Priotto G, Kasparian S, Mutombo W, Ngouama D, Ghorashian S, Arnold U, et al. Nifurtimox-  
692 eflornithine combination therapy for second-stage African *Trypanosoma brucei* gambiense  
693 trypanosomiasis: a multicentre, randomised, phase III, non-inferiority trial. *Lancet.*  
694 2009;374(9683):56-64.
- 695 64. Gadelha C, Zhang W, Chamberlain JW, Chait BT, Wickstead B, Field MC. Architecture of a  
696 Host-Parasite Interface: Complex Targeting Mechanisms Revealed Through Proteomics. *Mol Cell*  
697 *Proteomics.* 2015;14(7):1911-26.
- 698 65. Jackson AP, Allison HC, Barry JD, Field MC, Hertz-Fowler C, Berriman M. A cell-surface  
699 phylome for African trypanosomes. *PLoS Negl Trop Dis.* 2013;7(3):e2121.
- 700 66. Shimogawa MM, Saada EA, Vashisht AA, Barshop WD, Wohlschlegel JA, Hill KL. Cell Surface  
701 Proteomics Provides Insight into Stage-Specific Remodeling of the Host-Parasite Interface in  
702 *Trypanosoma brucei*. *Mol Cell Proteomics.* 2015;14(7):1977-88.
- 703 67. Florens L, Washburn MP, Raine JD, Anthony RM, Grainger M, Haynes JD, et al. A proteomic  
704 view of the *Plasmodium falciparum* life cycle. *Nature.* 2002;419(6906):520-6.
- 705 68. El-Manzalawy Y, Munoz EE, Lindner SE, Honavar V. PlasmoSEP: Predicting surface-exposed  
706 proteins on the malaria parasite using semisupervised self-training and expert-annotated data.  
707 *Proteomics.* 2016;16(23):2967-76.
- 708 69. Dutton G. Trends in Monoclonal Antibody Production. *Genetic Engineering & Biotechnology*  
709 *News.* 2010;30(4).
- 710 70. Tiberghien AC, von Bulow, C., Barry, C., Ge, H., Noti, C., Leiris, F.C., McCormick, M., Howard,  
711 P.W. and Parker, J.S. Scale-up Synthesis of Tesirine. *Organic Process Research and Development.*  
712 2018;22:1241-56.
- 713 71. Kelley B. Industrialization of mAb production technology: the bioprocessing industry at a  
714 crossroads. *MAbs.* 2009;1(5):443-52.
- 715 72. Pollard ME, Moskowitz AJ, Diefenbach MA, Hall SJ. Cost-effectiveness analysis of treatments  
716 for metastatic castration resistant prostate cancer. *Asian J Urol.* 2017;4(1):37-43.
- 717 73. Pollock J, Coffman J, Ho SV, Farid SS. Integrated continuous bioprocessing: Economic,  
718 operational, and environmental feasibility for clinical and commercial antibody manufacture.  
719 *Biotechnol Prog.* 2017;33(4):854-66.

- 720 74. Vaughan TJ, Williams AJ, Pritchard K, Osbourn JK, Pope AR, Earnshaw JC, et al. Human  
721 antibodies with sub-nanomolar affinities isolated from a large non-immunized phage display library.  
722 Nat Biotechnol. 1996;14(3):309-14.
- 723 75. Dimasi N, Gao C, Fleming R, Woods RM, Yao XT, Shirinian L, et al. The design and  
724 characterization of oligospecific antibodies for simultaneous targeting of multiple disease mediators.  
725 J Mol Biol. 2009;393(3):672-92.
- 726 76. Hirumi H, Hirumi K. Continuous cultivation of *Trypanosoma brucei* blood stream forms in a  
727 medium containing a low concentration of serum protein without feeder cell layers. J Parasitol.  
728 1989;75(6):985-9.
- 729 77. Limited S. Pyrrolobenzodiazepines and conjugates thereof. International publication number  
730 WO 2011/130598 A1. Filed 15th April 2011, issued 20th October 2011.
- 731 78. SARL S. Pyrrolobenzodiazepines and conjugates thereof. International publication number  
732 WO 2014/140862 A2. Filled 13th March 2014, issued 18th September 2014.

733

734

## 735 **Figures Legends**

736

### 737 **Figure 1: The generation of ADCs that target the *T. brucei* HpHbR.**

738 (A) Workflow for the generation of anti-trypanosomal ADCs. (B) Structures of the two  
739 PBD toxins (SG3199 and SG3552) and their corresponding toxins plus linker  
740 derivatives (SG3249 and SG3376) used in this study. Note that the linker of SG3249  
741 contains a cleavable dipeptide motif whereas the linker of SG3376 does not.

742

### 743 **Figure 2: Receptor mediated endocytosis of humanised anti-HpHbR IgG1s.**

744 Uptake of Alexa594-labelled antibodies into *T. b. brucei* Lister 427 *HpHbR* wild type  
745 and *-/-* cells was monitored by microscopy. Uptake of five of the seven selected  
746 antibodies was detected at 10 nM in wild-type (indicated by arrows in upper panel)  
747 but not in *HpHbR -/-* cells (lower panel). No specific uptake of the remaining antibody  
748 (Tb086) or a control antibody (NIP228) was detected. Scale bar represents 10  $\mu$ m.

749

750 **Figure 3: HpHbR antibody-PBD conjugates result in *T. brucei* cell death at low**  
751 **picomolar concentrations *in vitro* in a HpHbR-dependent manner.**

752 (A) Toxin SG3199 kills *T. b. brucei* wild type cells at sub-picomolar concentrations  
753 ( $IC_{50}$  0.86 pM), killing activity is reduced by the addition of a linker (SG3249  $IC_{50}$   
754 236.0 pM). Conjugation of SG3249 to a non-specific control antibody (NIP228)  
755 further reduces trypanosome killing activity to low nanomolar concentrations ( $IC_{50}$  2.1  
756 nM) whereas conjugation of SG3249 to antibodies that target the HpHbR increased  
757 killing activity to low picomolar concentrations ( $IC_{50}$  values range from 86 pM for  
758 Tb073-SG3249 to 9.4 pM for Tb085-SG3249). All assays were carried out in  
759 triplicate over 48 hours. Lines represents nonlinear regression lines of best fit on  
760  $Log_{10}$  transformed data. Error bars represent standard error of the mean (s.e.m.),  
761  $n=3$  biological replicates (carried out in parallel). (B) Toxin SG3552 kills *T. b. brucei*  
762 wild type and HpHbR  $-/-$  cells with sub-picomolar  $IC_{50}$  concentrations The  $IC_{50}$  is  
763 increased by orders of magnitude by the addition of a linker (Table 1). Conjugation of  
764 SG3376 to a non-specific control antibody (NIP228) further increases the  $IC_{50}$  to  
765 nanomolar concentrations in both trypanosome cell lines. HpHbR antibody SG3376  
766 conjugates have an  $IC_{50}$  in the low/sub picomolar range for wild type *T. b. brucei*. In  
767 contrast,  $IC_{50}$  values with *T. b. brucei* HpHbR  $-/-$  cells remained similar to the control  
768 ADC. All assays were carried out in triplicate over 48 hours. Lines represents  
769 nonlinear regression lines of best fit on  $Log_{10}$  transformed data. See Table 1 for  
770 corresponding  $IC_{50}$  values. Error bars represent s.e.m.,  $n=3$  biological replicates  
771 (carried out in parallel).

772

773 **Figure 4: A single low dose of Tb085-SG3376 was able to cure infection in a**  
774 **mouse model of trypanosomiasis.**

775 Three groups of 5 mice were infected with pleomorphic *T. b. brucei* GVR35-VSL2  
776 cells (32, 33), which allow for parasite burden in live mice to be assessed over a time  
777 course by bioluminescent imaging (BLI). BLI was performed prior to any treatment at  
778 3 dpi and then at regular time points following treatment on 3 dpi with a single  
779 intravenous dose of (1) 0.25 mg/kg Tb085-SG3376 (n=5), (2) 0.25 mg/kg NIP228-  
780 SG3376 (n=5) or (3) PBS alone (n=5). Unlike the control-treated mice, Tb085-  
781 SG3376 treatment caused a decrease in the luminescent signal to that obtained from  
782 uninfected control animals within 2 days and this remained the case for the duration  
783 of the infection, including following the immunosuppression of Tb085-SG3376  
784 treated mice at 66 dpi. Mice treated with NIP228-SG3376 or PBS were culled at a  
785 humane endpoint on day 14. (A) Quantification shown is the combined (dorsal +  
786 ventral) luminescence over the whole mouse in photos per second (p/s). The  
787 corresponding quantification data from the 18 individual mice are shown in S5  
788 Figure. Error bars represent standard deviation. Downward error bars are missing  
789 from 4 data points due to scale constraints. (B) For each group of mice selected  
790 ventral images for the BLI are shown. Corresponding dorsal images of the same  
791 mice are shown in S4 Figure. The scale bar represents the photons emitted at any  
792 given point on the image. Exposure times range from 0.5 seconds (for heavily  
793 burdened mice) to 5 minutes (for uninfected animals). One mouse in the PBS control  
794 group had a lower BLI signal than all other infected mice at 3 dpi (S5 Figure). In the  
795 image shown here this mouse appears negative, however, this is due to the low  
796 exposure time required for adjacent mice.

797

798

799

## 800 **Supporting information Figure Legends**

801

802 **S1 Figure: Sequences of the six scFv targeting the HpHbR NTD.** The framework  
803 domains (FW) are shown in black and the complementarity-determining regions  
804 (CDR1-3) are shown in blue. Sequence variation between scFvs is in CDR3, as  
805 annotated by grey boxes.

806

807 **S2 Figure: Conjugating toxin SG3552 to antibodies that recognise the *T. brucei***  
808 **HpHbR reduces toxicity against human cell lines.** Toxin SG3552, toxin plus linker  
809 SG3376 and the associated ADCs were incubated with (A) Jurkat T-cells, (B) Human  
810 Umbilical Vein Endothelial Cells (C) Normal Human Lung Fibroblasts, and (D) Raji B-  
811 cell lymphoma cells in FCS. Toxin SG3552 kills the human cell lines at picomolar  
812 concentrations. Killing activity is reduced in all cell lines by the addition of the linker  
813 (SG3376) or incorporation into a control or Anti-HpHbR ADC (NIP22-SG3376,  
814 Tb074-SG3376, Tb085-SG3376) to mid-to-high nanomolar concentrations. Lines  
815 represents nonlinear regression lines of best fit on Log<sub>10</sub> transformed data, although  
816 it was not possible to fit accurate lines or calculate IC<sub>50</sub> values for the ADCs due to  
817 lack of saturation of the cell killing assay. All assays were carried out in triplicate over  
818 96 hours. Error bars represent s.e.m., n=3.

819

820 **S3 Figure: Mass Spectrometry analysis of SG3376-containing antibody-toxin**  
821 **conjugates.** Mass spectrometry analysis of reduced antibody-toxin conjugates was  
822 performed using a RSLC UPLC system coupled to an Exactive EMR Orbitrap MS. L0  
823 = unconjugated light chain species, H0 = unconjugated heavy chain species, H1 =  
824 conjugated heavy chain species.

825

826 **S4 Figure: Bioluminescent imaging of *T. b. brucei* infected mice before and**  
827 **after treatment with antibody-toxin conjugates.**

828 Parasite burden in mice infected with pleomorphic *T. b. brucei* GVR35-VSL2 cells  
829 was assessed by BLI following intraperitoneal injection of d-luciferin. BLI was  
830 performed prior to any treatment at 3 days post infection (dpi) and then at regular  
831 time points following treatment on 3 dpi with (1) Tb085-SG3376 (n=5), (2) NIP228-  
832 SG3376 (n=5) or (3) PBS alone (n=5), with selected time points shown here.

833 Uninfected mice were imaged as controls (n=3). Treatment with Tb085-SG3376  
834 decreased the luminescent signal to that obtained from uninfected control animals  
835 within 2 days and this remained the case for the duration of the infection, including  
836 following the immunosuppression of Tb085-SG3376- treated mice at 66 dpi.

837 For each group of mice both the dorsal and ventral images are shown. Scale bar  
838 represents the photons emitted at any given point on the image. Exposure times  
839 range from 0.5 seconds (for heavily burdened mice) to 5 minutes (for uninfected  
840 animals). One mouse in the PBS control group had a lower BLI signal than all other  
841 infected mice at 3 dpi (S5 Figure). In the image shown here this mouse appears  
842 negative, however, this is due to the low exposure time required for adjacent mice.

843 Quantification of the total luminescence from each mouse was also carried out  
844 (Figure 4 and S5 Figure).

845

846 **S5 Figure: A single low dose of Tb085-SG3376 was able to cure infection in a**  
847 **mouse model of trypanosomiasis: data from individual mice.**

848 Three groups of 5 mice were infected with pleomorphic *T. b. brucei* GVR35-VSL2  
849 cells, which allow for parasite burden in live mice to be assessed over a time course

850 by bioluminescent imaging (BLI). BLI was performed prior to any treatment at 3 dpi  
851 and then at regular time points following treatment on 3dpi with a single intravenous  
852 dose of (1) 0.25 mg/kg Tb085-SG3376 (n=5), (2) 0.25 mg/kg NIP228-SG3376 (n=5)  
853 or (3) PBS alone (n=5). Unlike the control-treated mice, Tb085-SG3376 treatment  
854 caused a decrease in the luminescent signal to that obtained from uninfected control  
855 animals within 2 days and this remained the case for the duration of the infection,  
856 including following the immunosuppression of Tb085-SG3376 treated mice at 66 dpi.  
857 Mice treated with NIP228-SG3376 or PBS were culled at a humane endpoint on day  
858 14. Quantification shown is the combined (dorsal + ventral) luminescence over the  
859 whole mouse in photos per second (p/s). The combined quantification data from the  
860 4 groups of mice are shown in Figure 4. Selected images for the BLI are shown in S5  
861 Figure.

862

863 **S6 Figure: No parasites were detected by BLI post-necropsy in *T. b. brucei***  
864 **infected mice following treatment with Tb085-SG3376.** The five mice that were  
865 infected with pleomorphic *T. b. brucei* GVR35-VSL2 cells, treated with 0.25 mg/kg  
866 Tb085-SG3376 (3 dpi) and immunosuppressed (66 dpi) were culled at 80 dpi. Post-  
867 necropsy, mice corpses and selected organs were assessed by BLI. Consistent with  
868 BLI data from live mice, BLI signal was equivalent to the uninfected control mice.

869

870 **S1 Table: IC<sub>50</sub> values (pM) of SG3199-based toxins and antibody-toxin**  
871 **conjugates against wild type *T. b. brucei*.** The IC<sub>50</sub> values of toxin SG3199, toxin  
872 plus linker SG3249, a control ADC (NIP228-SG3249) and five anti-trypanosome  
873 antibody toxin conjugates targeting the *T. brucei* HpHbR (Tb017-SG3249, Tb073-  
874 SG3249, Tb074-SG3249, Tb078-SG3249, Tb085-SG3249) were calculated against



875 *T. b brucei* wild type (Figure 3). Values in bold are best-fit IC<sub>50</sub> values, the range is  
876 the 95% confidence intervals. All values are shown to 3 significant figures.

877

878 **S2 Table: Monomer content and drug-antibody-ratio (DAR) of SG3376-**  
879 **containing Antibody-toxin conjugates.** Monomeric purity was determined by size  
880 exclusion chromatography (SEC) and the DAR was determined by RP-HPLC. Both  
881 assays were performed on a Shimadzu Nexera UPLC system fitted with a Shimadzu  
882 Prominence DAD detector. Data were processed using LabSolutions software.

883

884

885

886

887

888

889

890

891

892

893

894

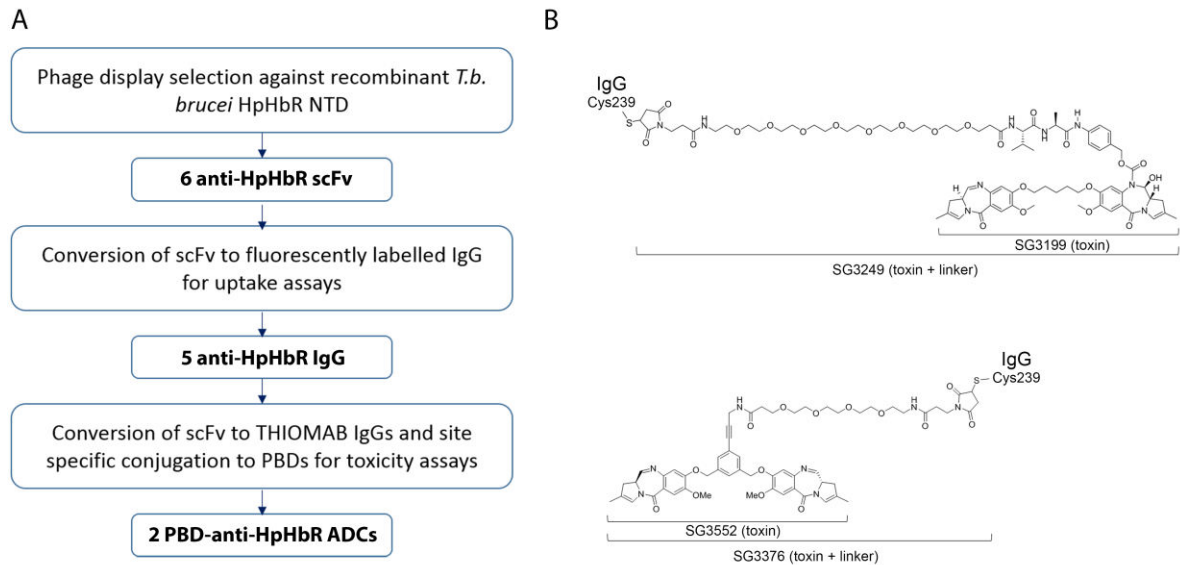

895

896 **Figure 1**

897

898

899

900

901

902

903

904

905

906

907

908

909

910

911

912

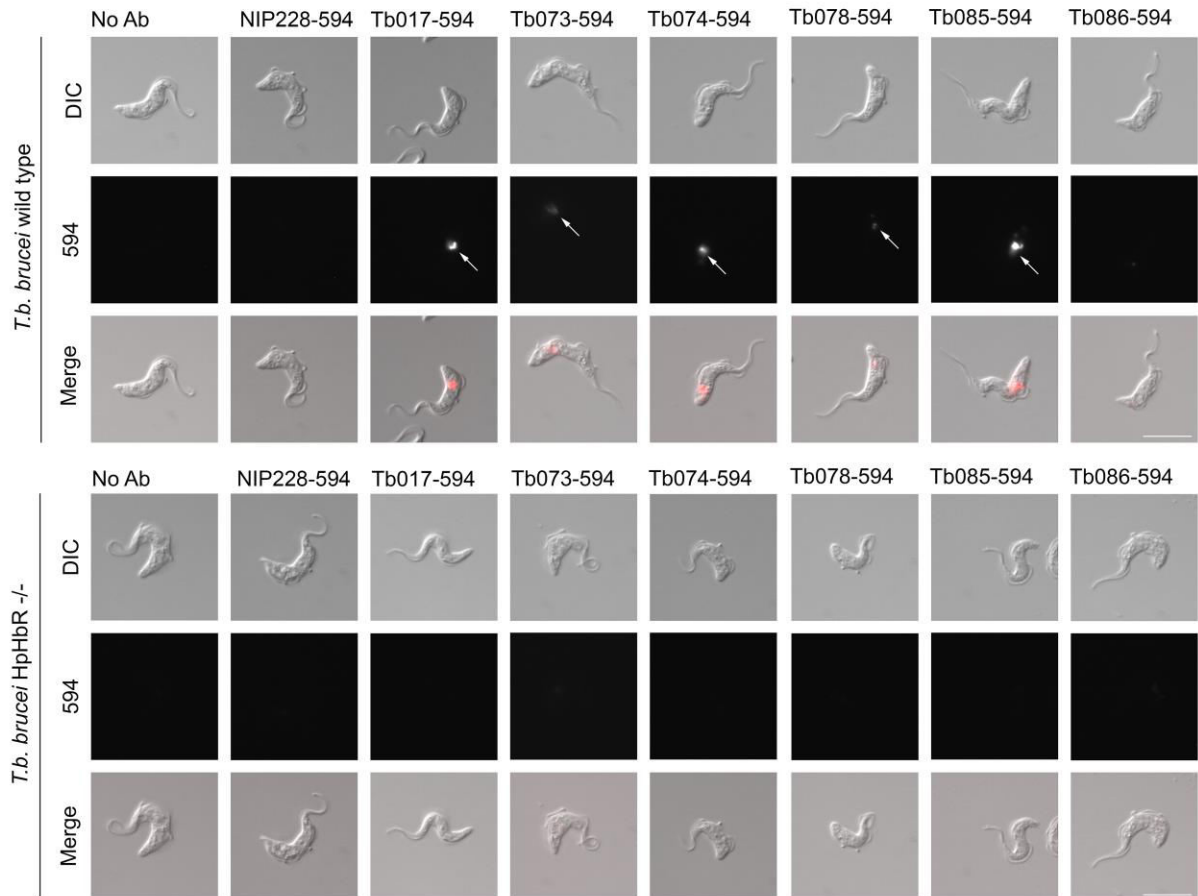

913

914 **Figure 2**

915

916

917

918

919

920

921

922

923

924

925

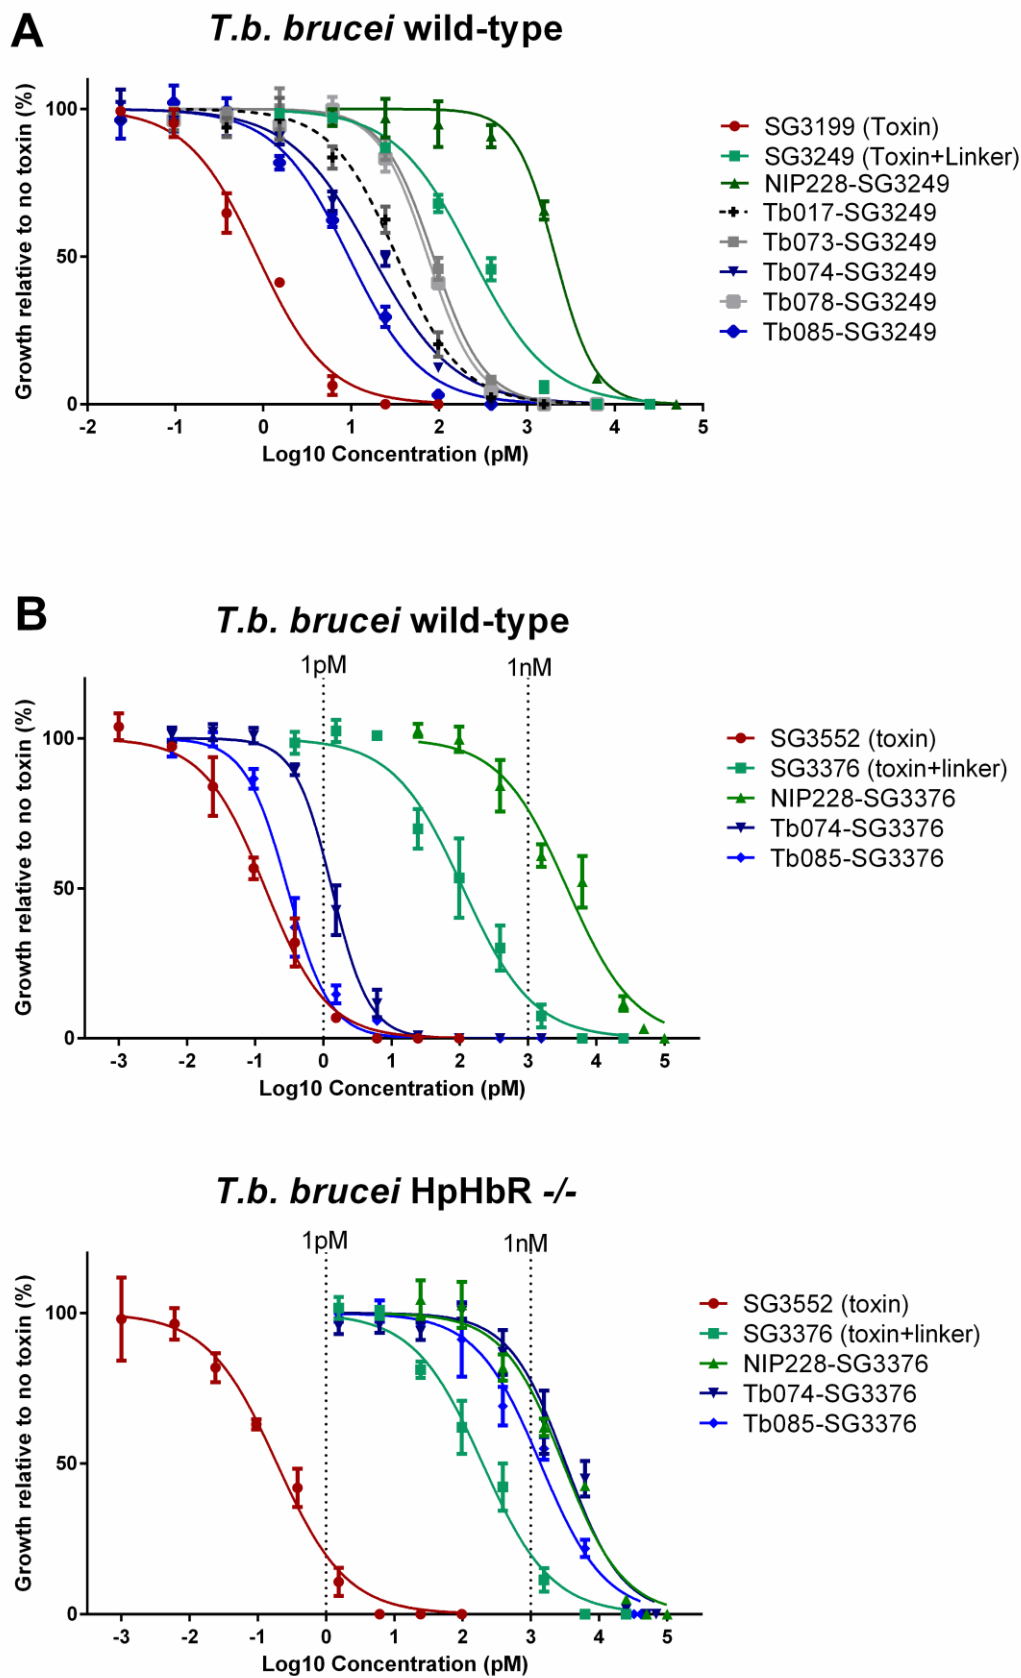

926

927 **Figure 3**

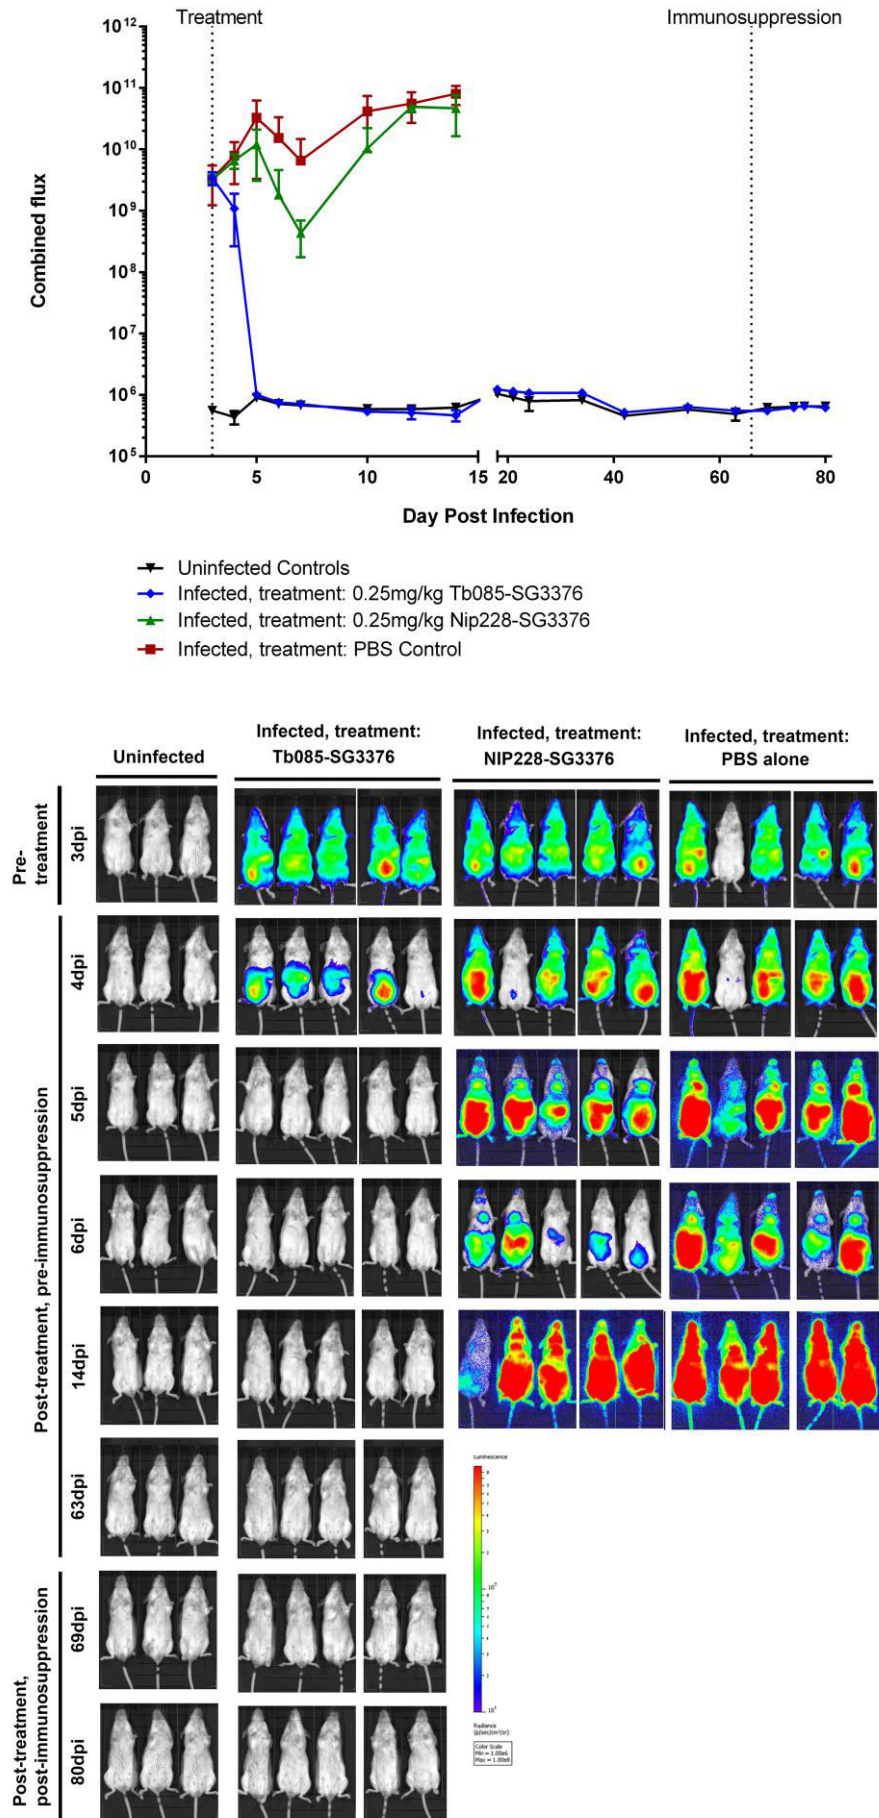

928 **Figure 4**

## 929 Supporting Information Figures and Tables

### Heavy chain sequence

|       | FW 1                          | CDR 1                               | FW 2 | CDR 2 |
|-------|-------------------------------|-------------------------------------|------|-------|
| Tb017 | QVQLVQSGAEVKKPQSSVKVSKASGGTFS | SYAISWVRQAPGQGLEWMGGIIPFGTANYAQKFGG |      |       |
| Tb073 | QVQLVQSGAEVKKPQSSVKVSKASGGTFS | SYAISWVRQAPGQGLEWMGGIIPFGTANYAQKFGG |      |       |
| Tb074 | QVQLVQSGAEVKKPQSSVKVSKASGGTFS | SYAISWVRQAPGQGLEWMGGIIPFGTANYAQKFGG |      |       |
| Tb078 | QVQLVQSGAEVKKPQSSVKVSKASGGTFS | SYAISWVRQAPGQGLEWMGGIIPFGTANYAQKFGG |      |       |
| Tb085 | QVQLVQSGAEVKKPQSSVKVSKASGGTFS | SYAISWVRQAPGQGLEWMGGIIPFGTANYAQKFGG |      |       |
| Tb086 | QVQLVQSGAEVKKPQSSVKVSKASGGTFS | SYAISWVRQAPGQGLEWMGGIIPFGTANYAQKFGG |      |       |

  

|       | FW 3                                                    | CDR 3 | FW 4 |
|-------|---------------------------------------------------------|-------|------|
| Tb017 | RVTITADESTSTAYMELSSLRSEDTAVYYCARGWYDLVFDYWGQGITLVTVSS   |       |      |
| Tb073 | RVTITADESTSTAYMELSSLRSEDTAVYYCARGWYDMGDFDMWGQGITLVTVSS  |       |      |
| Tb074 | RVTITADESTSTAYMELSSLRSEDTAVYYCARGWHEPFGFDYWGQGITLVTVSS  |       |      |
| Tb078 | RVTITADESTSTAYMELSSLRSEDTAVYYCARGWIYEFIIIDAWGQGITLVTVSS |       |      |
| Tb085 | RVTITADESTSTAYMELSSLRSEDTAVYYCAREGWYGVWDFWQGITLVTVSS    |       |      |
| Tb086 | RVTITADESTSTAYMELSSLRSEDTAVYYCARGWYHGGIDYWGQGITLVTVSS   |       |      |

### Light chain sequence

|       | FW 1                                                      | CDR 1 | FW 2 | CDR 2 |
|-------|-----------------------------------------------------------|-------|------|-------|
| Tb017 | QSVLTQPPSASGTPGQRVTISCSGSSSNIGSNTVNWYQQLPGTAPKLLIYSNNQRPS |       |      |       |
| Tb073 | QSVLTQPPSASGTPGQRVTISCSGSSSNIGSNTVNWYQQLPGTAPKLLIYSNNQRPS |       |      |       |
| Tb074 | QSVLTQPPSASGTPGQRVTISCSGSSSNIGSNTVNWYQQLPGTAPKLLIYSNNQRPS |       |      |       |
| Tb078 | QSVLTQPPSASGTPGQRVTISCSGSSSNIGSNTVNWYQQLPGTAPKLLIYSNNQRPS |       |      |       |
| Tb085 | QSVLTQPPSASGTPGQRVTISCSGSSSNIGSNTVNWYQQLPGTAPKLLIYSNNQRPS |       |      |       |
| Tb086 | QSVLTQPPSASGTPGQRVTISCSGSSSNIGSNTVNWYQQLPGTAPKLLIYSNNQRPS |       |      |       |

  

|       | FW 3                                                      | CDR 3 | FW 4 |
|-------|-----------------------------------------------------------|-------|------|
| Tb017 | GVPDFRFSGSKSGTSASLAISGLQSEDEADYYCAAWDEYPPDQ-VVFGGGTKLTVL  |       |      |
| Tb073 | GVPDFRFSGSKSGTSASLAISGLQSEDEADYYCAAWDNHGHGVV-VVFGGGTKLTVL |       |      |
| Tb074 | GVPDFRFSGSKSGTSASLAISGLQSEDEADYYCAAWDEHVPPQ-VVFGGGTKLTVL  |       |      |
| Tb078 | GVPDFRFSGSKSGTSASLAISGLQSEDEADYYCAAWDMEEEH-VVFGGGTKLTVL   |       |      |
| Tb085 | GVPDFRFSGSKSGTSASLAISGLQSEDEADYYCAAWDVFNQNV-VVFGGGTKLTVL  |       |      |
| Tb086 | GVPDFRFSGSKSGTSASLAISGLQSEDEADYYCAAWDEVMPDQ-VVFGGGTKLTVL  |       |      |

930

## 931 S1 Figure

932

933

934

935

936

937

938

939

940

941

942

943

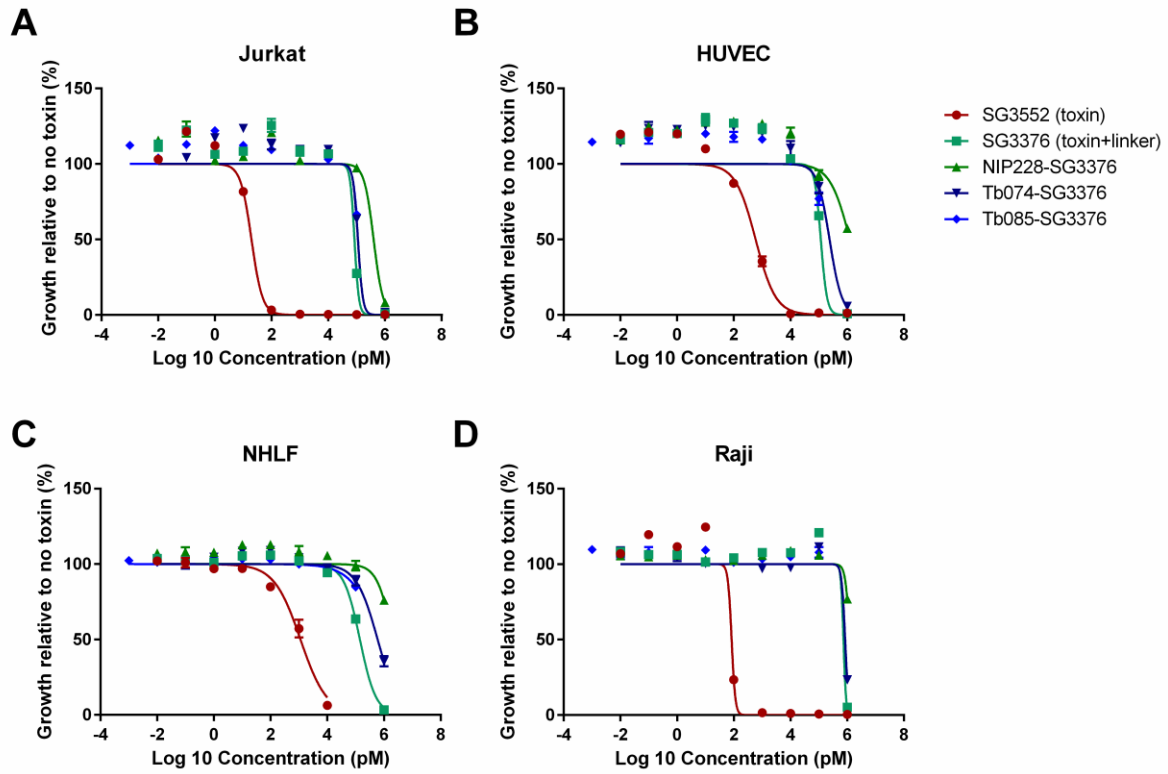

944

945 **S2 Figure**

946

947

948

A. Reduced LCMS data for NIP228-SG3376

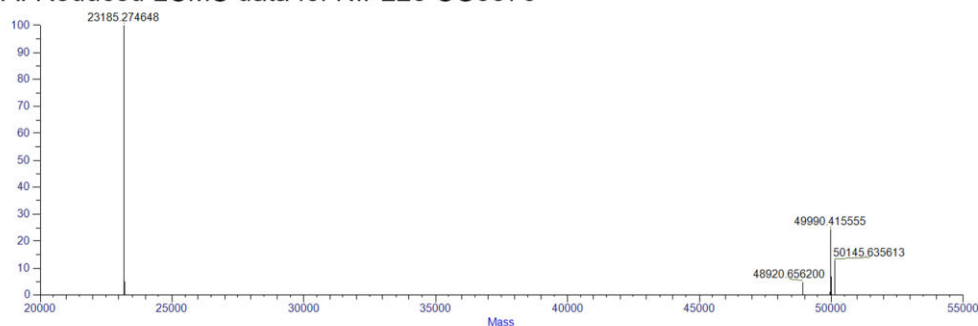

B. Reduced LCMS data for Tb074-SG3376

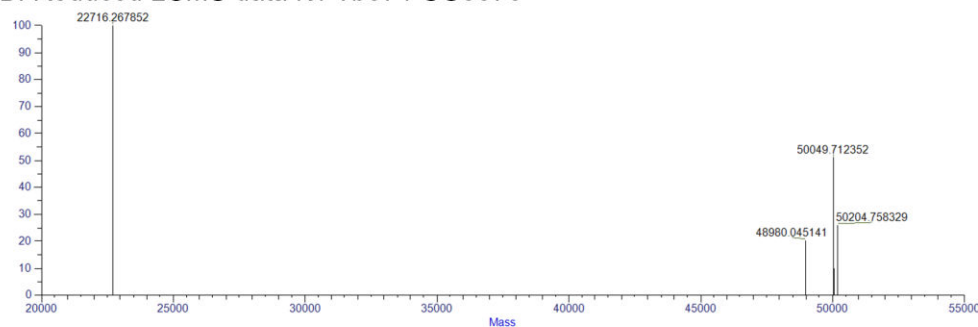

C. Reduced LCMS data for Tb085-SG3376

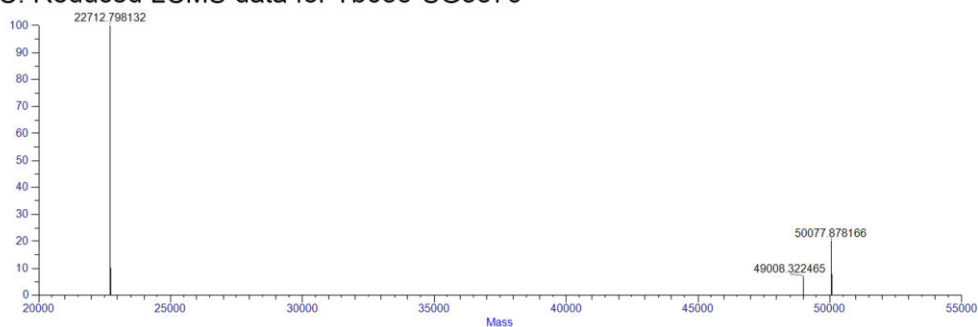

D. Summarised mass spectrometry analysis of reduced ADCs

| ADC           | L0 (Da) |         | H0 (Da) |         | H1 (Da) |         |
|---------------|---------|---------|---------|---------|---------|---------|
|               | Theor.  | Found   | Theor.  | Found   | Theor.  | Found   |
| NIP228-SG3376 | 23187.8 | 23185.3 | 48923.1 | 48920.7 | 49993.3 | 49990.4 |
| Tb074-SG3376  | 22717.1 | 22716.3 | 48982.3 | 48980   | 50052.5 | 50049.7 |
| Tb085-SG3376  | 22714.1 | 22712.8 | 49010.3 | 49008.3 | 50080.5 | 50077.9 |

949

950 **S3 Figure**

951

952

953



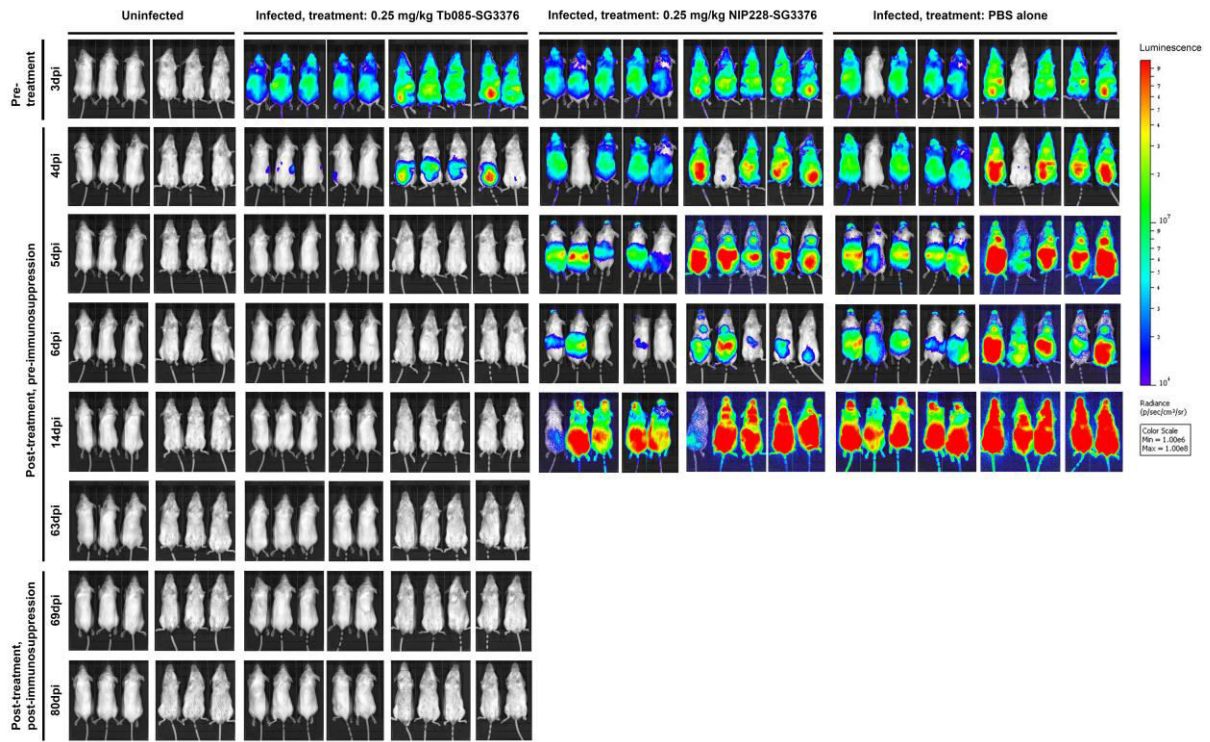

954

955 **S4 Figure**

956

957

958

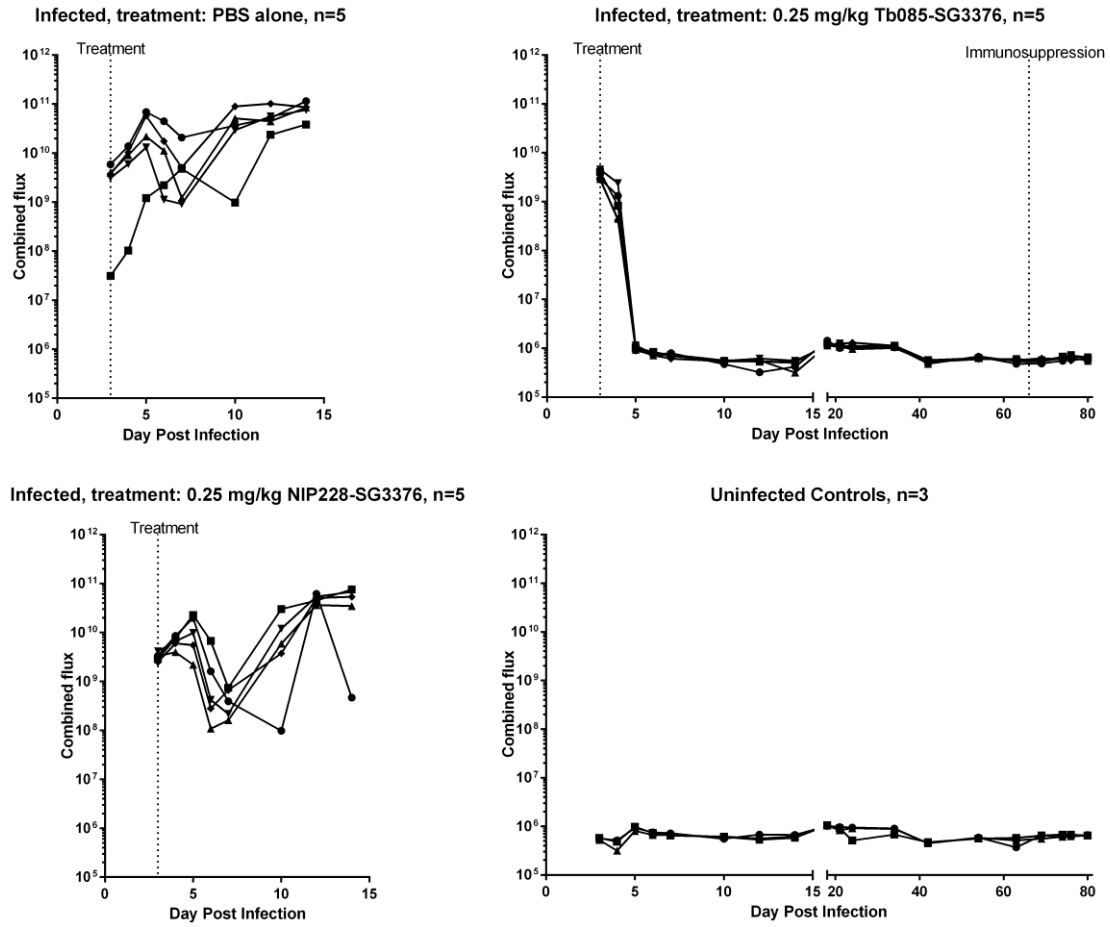

959

960 **S5 Figure**

961

962

963

964

965

966

967

968

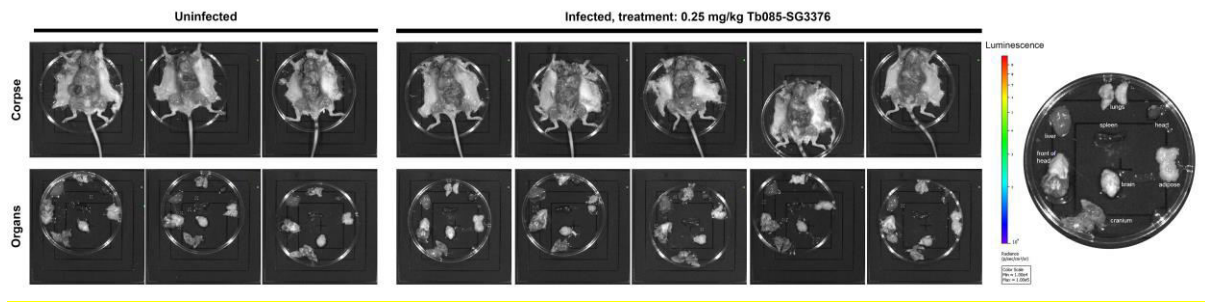

969

970 **S6 Figure**

971

972

973

974

975

976

977

978

979

980

981

982

983

984

985

986

987

988

989

990

991 **Supporting Information Tables**

| IC50 (pM)                       |                            |
|---------------------------------|----------------------------|
|                                 | <i>T. b. brucei</i>        |
| <b>SG3199 Toxin</b>             | <b>0.86</b><br>(0.69-1.08) |
| <b>SG3249 Toxin plus Linker</b> | <b>236</b><br>(196-284)    |
| <b>NIP228-SG3249 Control</b>    | <b>2100</b><br>(1760-2500) |
| <b>Tb017-SG3249</b>             | <b>32.9</b><br>(26.8-40.3) |
| <b>Tb073-SG3249</b>             | <b>85.7</b><br>(74.6-98.6) |
| <b>Tb074-SG3249</b>             | <b>17.3</b><br>(14.3-21.1) |
| <b>Tb078-SG3249</b>             | <b>74.2</b><br>(64.3-85.7) |
| <b>Tb085-SG3249</b>             | <b>9.35</b><br>(7.59-11.5) |

992

993 **S1 Table**

994

995

996

997

998

999

1000

| <b>Antibody toxin conjugate</b> | <b>SEC</b>   |                  |              | <b>DAR</b> |
|---------------------------------|--------------|------------------|--------------|------------|
|                                 | <b>% HMW</b> | <b>% Monomer</b> | <b>% LMW</b> |            |
| <b>NIP228-SG3376</b>            | 3.2          | 90.1             | 6.7          | 1.77       |
| <b>Tb074-SG3376</b>             | 5.4          | 92.1             | 2.5          | 1.80       |
| <b>Tb085-SG3376</b>             | 0            | 100              | 0            | 1.79       |

1001

1002 **S2 Table**

1003
